# Supplementary material
Source: Elsevier journal article supplement (https://www.sciencedirect.com/science/article/pii/S0122726220300859)

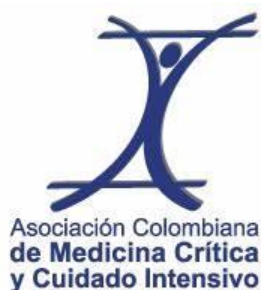

---

## ASOCIACIÓN COLOMBIANA DE MEDICINA CRÍTICA Y CUIDADO INTENSIVO AMCI

### Participantes del Consenso

ACTUALIZACIÓN 17 JULIO 2020

### DECLARACIÓN DE CONSENSO EN MEDICINA CRÍTICA PARA LA ATENCIÓN MULTIDISCIPLINARIA DEL PACIENTE CON SOSPECHA O CONFIRMACIÓN DIAGNÓSTICA DE COVID-19

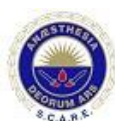

Sociedad Colombiana de  
Anestesiología y Reanimación

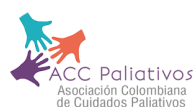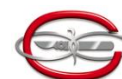

ASOCIACIÓN  
COLOMBIANA  
DE CIRUGÍA

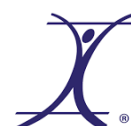

## GRUPO DESARROLLADOR

### **Jose Luis Accini Mendoza**

#### **Presidente AMCI Nacional**

MD Internista Intensivista  
Coordinador UCI Adulto Hospital  
Universidad del Norte  
Docente Postgrado Universidad del  
Norte  
Docente Universidad Libre

### **Victor Hugo Nieto Estrada**

#### **Director del Consenso**

MD Internista Intensivista.  
Epidemiólogo clínico  
Director Grupo Investigación GriBos  
Profesor Fundación Universitaria  
Sanitas  
Profesor Ad honorem Universidad el  
Bosque

### **Nelly Beltrán López**

#### **Núcleo Central AMCI**

MD Internista Intensivista  
Epidemióloga  
Instructor FCCS-FDM-BLS-ACLS  
Docente Universidad del Norte.  
Expresidente AMCI Regional Caribe.

### **Elisabeth Ramos Bolaños**

#### **Núcleo Central AMCI**

MD Internista  
Magíster en Epidemiología  
Universidad del Norte  
Fellow De Medicina Crítica y Cuidado  
Intensivo, Universidad de Cartagena



## PARTICIPANTES

### JEFES DE NÚCLEO

#### Jose Luis Accini Mendoza

Presidente AMCI Nacional  
MD Internista Intensivista Coordinador UCI Adulto  
Hospital Universidad del Norte  
Docente Postgrado Universidad del Norte.  
Docente Universidad Libre

#### Daniel Molano Franco Md MSc

MD Especialista Cuidado Intensivo -FUCS  
Máster Prevención y control infecciones nosocomiales –  
Universidad Barcelona  
Instructor Medicina crítica y Cuidado Intensivo FUCS.  
Intensivista Hospital San José- FUCS- Clínica Los Cobos  
Medical Center- U Bosque (Bogotá-Colombia)

#### Carmelo Dueñas Castell

MD Internista Intensivista Neumólogo  
Director del Postgrado de Medicina crítica y cuidado  
intensivo Universidad de Cartagena. Expresidente AMCI  
Nacional

#### Albert Alexander Valencia Moreno

MD Anestesiólogo especialista en  
Medicina Intensiva. Epidemiólogo Clínico. Jefe Unidad  
de Cuidados Intensivos Loscobos Medical Center

#### Iván Camilo Alarcón Amaya

MD anestesiólogo Especialista en Medicina Crítica y  
Cuidados Intensivos  
Especialista adscrito Los Cobos Medical Center, Clínica  
Colsanitas. Docente Universidad del Bosque

#### John Serna Flórez

MD internista Nefrólogo Intensivista Epidemiólogo  
Profesor Universidad del Quindío  
Hospital San Juan de Dios Pereira  
Hospital San Jorge Pereira

#### Bladimir Alejandro Gil Valencia

MD anestesiólogo intensivista. Epidemiólogo  
Jefe UCI Clínica las américas- Auna.  
Intensivista Clínica Medellín  
Profesor titular Universidad Pontificia Bolivariana

#### Camilo Pizarro G

MD Anestesiólogo Intensivista  
Jefe UCI Fundación Cardiovascular de  
Colombia. Vicepresidente AMCI 2019-2021

#### Yulieth María Zabaleta Polo

Enfermera especialista en Cuidado Crítico  
Adultos. Coordinadora Clínica Nueva el Lago Bogotá  
Vocal de Enfermería AMCI nacional  
Representante por Colombia ante FLECI

#### Carmen Lucia Chica Meza

Fisioterapeuta, especialista en Cuidado Crítico,  
Magister en microbiología clínica Cartagena. Docente  
pregrado, posgrado y educación continuada universidad  
Simón Bolívar, UDES Valledupar y Autónoma de  
Manizales. Vocal nacional terapia respiratoria y  
fisioterapia intensiva AMCI

## EXPERTOS PARTICIPANTES (TEMÁTICOS)

#### Ronald Antonio Medina Lombo

MD Especialista Cuidado Intensivo -FUCS  
Especialista en Epidemiología Clínica -FUCS. Instructor  
Medicina crítica y cuidado Intensivo FUCS  
Coordinador Unidad de Cuidado Intensivo Clínica VIP  
(Bogotá-Colombia)

#### María Cristina Florián Pérez

MD Internista Intensivista epidemióloga  
Coordinadora programa de medicina crítica y cuidado  
intensivo U de caldas.

#### Yenny Cárdenas Bolívar Md MSc

MD Especialista Cuidado Intensivo- Universidad del  
Rosario. Magister en Educación Universidad de los  
Andes. Fiscal Asociación Colombiana de Medicina  
Crítica y Cuidado Intensivo  
Intensivista e Coordinadora de Investigación Fundación  
Santa Fe (Bogotá- Colombia)

#### Mauricio Gómez Betancourt Md MSc

MD Especialista Cuidado Intensivo- Unisanitas  
Emergenciólogo- Universidad del Rosario  
Maestría en epidemiología – Universidad Javeriana  
Intensivista Clínica Los Cobos Medical Center- Clínica  
Colombia- Fundación Cardioinfantil (Bogotá- Colombia)

#### Orlando Polo Arrieta

MD Especialista Cuidado intensivo – Unisanitas  
Coordinador Unidad de Cuidado Intensivo Clínica 94  
(Bogotá-Colombia)

#### Luis Horacio Atehortúa López

MD. Internista, Intensivista, MSc  
Coordinador posgrado en MCCI  
Universidad de Antioquia.  
Director de investigaciones Hospital Universitario San  
Vicente Fundación  
Expresidente AMCI

#### Agamenón Quintero Villarreal

MD Especialista medicina crítica y cuidado intensivos.  
Jefe servicio medicina crítica Imatoncomédica  
Expresidente AMCI. Vocal ACSC  
Vicepresidente FEPIMCTI

#### Marco Antonio González Agudelo

MD. Internista, Intensivista. Especialista en Gerencia en  
Economía y Finanzas de la Salud,  
Magister en seguridad del paciente y gestión de riesgo.  
Ms Trastornos de Sueño. MBA INALDE business school.  
Decano Escuela de Ciencias de la Salud UPB  
Coordinador programa posgrado de medicina crítica y  
cuidados intensivos UBP  
Expresidente AMCI

#### Julio Cesar Duran Pérez

MD Especialista en Medicina Crítica y Cuidados  
Intensivos. Especialista en Epidemiología. Coordinador  
UCI Instituto Cardiovascular del Cesar.  
Expresidente AMCI Regional Caribe.  
Secretario junta directiva AMCI

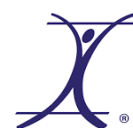

**Manuel Garay Fernández**

MD Internista intensivista Neumólogo.  
Universidad El Bosque. Intensivista Hospital Santa Clara,  
Bogotá. Miembro AMCI

**Guillermo Ortiz**

MD Internista Intensivista neumólogo Epidemiólogo.  
Director Cuidado crítico Hospital Santa Clara  
Director posgrados de medicina interna, neumología,  
cuidado crítico Universidad Del Bosque  
(Bogotá-Colombia)  
Expresidente AMCI Nacional

**Carlos Rebolledo M**

MD Internista intensivista-instructor FCCS –FDM.  
Docente Postgrado Medicina Crítica. Universidad Simón  
Bolívar y postgrado de Medicina Interna Universidad  
Libre Coordinador UCI Clínica Iberoamérica - Clínica  
General del Norte. Expresidente AMCI Regional

**José Antonio Rojas Gambasica**

MD Anestesiólogo - Intensivista  
Jefe médico Unidad Cuidados intensivos  
Clínica Universitaria Colombia  
Clínica Santa María del Lago

**Arturo Arias**

MD Anestesiólogo Intensivista Paliativista  
Clínica Norte Cúcuta

**Eduardo Barciela**

MD Internista Intensivista Auditor  
Presidente AMCI Regional Caribe.

**Vanesa Torres**

MD Pediatra Intensivista  
Coordinadora UCI pediátrica Clínica SOMER, Rionegro

**José Antonio Rojas Suarez**

MD Internista Epidemiólogo MSc  
Profesor asistente medicina interna y medicina crítica,  
Universidad de Cartagena  
Docente Medicina Interna, Corporación universitaria  
Rafael Núñez. Director Médico Unidad de cuidados  
Intensivos, Clínica Gestión Salud, Cartagena  
Editor Revista AMCI Universidad de Cartagena

**Antonio Jose Oyola Yepes**

MD Anestesiólogo Intensivista  
Coordinador UCI Nuevo hospital Bocagrande  
Docente postgrado Universidad del Sinú

**Mario Alberto Castillo**

MD Anestesiólogo Intensivista  
Fundación Cardiovascular de Colombia.

**Antonio Figueredo**

MD Cirujano Cardiovascular.  
Director Médico Fundación Cardiovascular  
de Colombia-Hospital Internacional de Colombia

**Luis Alexander Peña López.**

Fisioterapeuta, Esp. En Fisioterapia del paciente adulto  
crítico, MSc. Gestión de Tecnologías Educativas,  
Departamento de Cuidado Intensivo, Hospital Susana  
López de Valencia. Universidad del Cauca  
Miembro activo AMCI

**Leonardo Salazar**

MD Anestesiólogo Cardiovascular Maestría en Ingeniería  
Biomédica  
Jefe ECMO-VAD Fundación Cardiovascular de Colombia  
Presidente ELSO LATAM 2018-2020

**Héctor Fabio Villamarín Guerrero**

Fisioterapeuta, Médico. MSc. Epidemiología, Esp.  
Fisioterapia en el Paciente Adulto Crítico, Esp.  
Rehabilitación Cardíaca y Pulmonar, Departamento de  
Cuidado Intensivo, Fundación Valle del Lili

**María Piedad Sarmiento**

MD Pediatra intensivista clínica Country Bogotá  
Expresidente AMCI Nacional.

**Esther C Wilches Luna**

Fisioterapeuta. Profesor Titular. Facultad.  
Universidad Del Valle.

**Francisco Jose Molina Saldarriaga**

MD Internista, Intensivista. Magister Epidemiología  
Clínica CES.  
Estudiante Doctorado Ciencias Médicas UPB  
Intensivista Clínica Bolivariana y Soma

**Francisco Naranjo**

MD Internista neumólogo intensivista. Profesor UIs y  
Unab. Director especialización medicina crítica unab.  
Jefe UCI clínica foscál

**Héctor Julio Meléndez**

MD MSc. Anestesiólogo Intensivista Epidemiólogo.  
Profesor Titular UIS  
Jefe UCI Adultos Clínica Foscál Internacional

**Francisco Ayola**

MD internista, intensivista. Especialista en nutrición  
clínica  
Jefe UCI obstétrica Hospital Niño Jesús

**Luz Estella Varela Londoño**

Enfermera, especialista en cuidado al adulto en estado  
crítico. Magister en Salud Colectiva, PhD Enfermería  
Docente universitaria Universidad de Antioquia  
Miembro AMCI.

**Rodrigo A. Murillo Arboleda**

MD Internista, intensivista. Docente Ad Honorem  
Universidad Pontificia Bolivariana.  
Docente Adscrito Universidad CES. Docente Adscrito  
Universidad de Antioquia.  
Miembro de número AMCI  
Clínica Las Américas - Clínica Medellín

**Jorge Fernando Miño Bernal**

MD Cirujano, Emergenciólogo Esp. en medicina crítica y  
cuidados intensivos  
Hospital Universitario del Valle, Universidad del Valle

**Pedro Pablo Pérez Sánchez**

MD Especialista Medicina familiar, Subespecialista en  
Medicina del dolor y cuidados paliativos  
Hospital Universitario Clínica San Rafael  
Hospital Universitario Nacional de Colombia  
Subred Integrada Servicios de Salud Suroccidente E.S.E

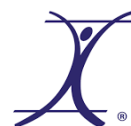

**Ana Lucia Rangel Colmenares**

Fisioterapeuta, Especialista paciente Adulto cuidado crítico – Gerencia y auditoría de la calidad en Salud H-UCI Clínica Norte  
Vocal regional FT/TR AMCI  
Cúcuta Norte de Santander

**Elkin Beltrán Carrascal**

MD Neurólogo, Hospital Universidad del Norte  
Docente de postgrado Medicina Interna, Universidad del Norte (Barranquilla- Atlántico)

**Alfredo Hinestrosa Díaz Del Castillo**

MD Internista, Especialista en medicina crítica y cuidados intensivos  
Jefe unidad de cuidados intensivos y director médico  
Los comuneros Hospital universitario de Bucaramanga

**Mauricio Vasco Ramírez**

MD anesthesiólogo  
Presidente Sociedad Colombiana de Anestesiología y Reanimación S.C.A.R.E

**Carlos Eduardo Laverde Sabogal**

MD anesthesiólogo intensivista  
Unidad de cuidado intensivo- Hospital Universitario San Ignacio. Profesor Asistente Centro de simulación Clínica Facultad de medicina Pontificia Universidad Javeriana  
Coordinador del Comité de Medicina Crítica y Cuidado Intensivo de la S.C.A.R.E

**Sandra Liliana Parra Cubides**

MD Internista, Especialista en Medicina del dolor y cuidados paliativos  
Presidente Asociación Colombiana de Cuidados Paliativos. Clínica El Rosario- Medellín

**Juan Bernardo Hoyos**

MD Fisiatra, Especialista en medicina del dolor y cuidados paliativos  
Secretario Asociación de Cuidados Paliativos  
Clínica Universitaria Colombia- Bogotá

**Pedro Pablo Pérez**

MD Familiar. Especialista en Medicina del dolor y Cuidados Paliativos. Vocal Asociación de Cuidados Paliativos - Bogotá

**Jorge Herrera Chaparro FACS, LATS, ACC**

Cirujano de Cabeza y Cuello  
Profesor titular Universidad del Cauca  
Director científico Clínica la Estancia  
Vocal junta directiva de la Sociedad Colombiana de Cirugía

**Cristina Quintero Rodríguez**

Terapeuta respiratoria certificada, Especialista en Gerencia de mercado estratégico  
MBA Marketing y ventas. Miembro activo en AMCI  
Colegio Colombiano de terapeutas respiratorios, y AARC

**Rubén Darío Camargo Rubio**

MD internista, Especialista en medicina crítica y cuidado intensivo. Máster en gestión de trasplantes y Bioética  
Docente universitario Universidad simón Bolívar  
Coordinador sección Bioética AMCI

**Luis Arcadio Cortés Puentes**

MD Especialista en medicina de emergencias, Medicina crítica y cuidado intensivo  
Intensivista Los Cobos Medical Center  
Intensivista unidades cardiovasculares Fundación Cardioinfantil Instituto de Cardiología

**Andrés Fabricio Caballero Lozada**

MD y Cirujano General, Fundación Universitaria Juan N. Corpas. Especialista en Anestesiología y Reanimación. Especialista en Medicina crítica y cuidado intensivo, Fundación Universitaria Ciencias de la Salud- Hospital de San José  
Profesor asistente del departamento de Anestesia, Medicina crítica y Cuidados intensivos, Universidad del Valle- Hospital Universitario del Valle  
Profesor catedra de Anestesiología, Universidad Central del Valle

**Héctor Javier Benítez Quiroz**

MD anesthesiólogo, Especialista en Neuroanestesia  
Profesor auxiliar del departamento anestesia/ medicina crítica y cuidado intensivo, Universidad del Valle  
Profesor hora catedra Universidad Javeriana Sede Cali

**Claudia Consuelo Torres Contreras**

Enfermera, Especialista en Cuidado intensivo  
Magister en enfermería con énfasis en gerencia de salud  
Aspirante al título de doctora en educación  
Vocal regional Santander  
Editora Jefe de Revista Cuidarte de la UDES

**Alejandra González Rincón**

Enfermera, Especialista en cuidado crítico del adulto, Esp. En Pedagogía y Docencia, Esp. En Gerencia de servicios de la salud. Candidata a magister en Salud Publica  
Profesora Facultad Ciencias de la Salud, Escuela de Medicina Universidad de Manizales

**Holmes Algarín**

MD Internista, Especialista en Medicina Crítica  
Coordinador UCI MiRed Barranquilla

**Fernando Meza Morón**

MD Internista, Especialista en Medicina Crítica y Cuidados intensivos  
Clínica Buenos Aires, Valledupar Colombia

**Viviana Cubillos**

FT especialista en Cuidado Crítico  
Docente posgrado Universidad del rosario  
Clínica Reina Sofía- Keralty Bogotá  
Especialista Clínica Equitronic

**Lysbeth Yamylle Roldán Valencia**

Terapeuta respiratoria certificada, especialista en TR pediátrica  
Magister en Salud pública y desarrollo social  
Internacional Fellow de la Asociación Americana de Cuidado respiratorio  
Docente investigador Universidad Manuela Beltrán



**Nancy Rebeca Uricoechea Cortes**

Terapeuta respiratoria, Especialista en RHB  
Cardiopulmonar  
Bachelor, Medical Science USA  
Ex Decana Programa de Terapia Respiratoria UMB  
Vocal Regional FT/TR AMCI Cundinamarca

**Jorge Alberto Muñoz R**

MD Internista Nefrólogo  
Clínica las Américas, Medellín Colombia

**Enrique Klahr**

MD Internista Nefrólogo  
Director Médico Unidad de Diálisis Fresenius, Clínica  
las Américas Medellín Colombia

**Néstor David Caicedo**

MD, Residente Cuarto Año de Medicina Crítica,  
Universidad de Manizales

**Hugo Domínguez**

MD, Residente Cuarto Año de Medicina Crítica,  
Universidad de Manizales

**Leonardo Marín Restrepo**

Unidad de cuidado Intensivo- Clínica Amiga  
Fresenius Medical Care

**David R. Echeverry P**

MD Especialista en Medicina Crítica y cuidado Intensivo  
Presidente AMCI eje cafetero  
Universidad Tecnológica de Pereira  
Hospital Universitario San Jorge

**Erick A Borja Large**

MD Internista, Especialista en Medicina crítica y  
cuidados intensivos  
Vicepresidente AMCI Regional Caribe

**Mauricio Antonio Martínez Arguello**

MD anesthesiologo Intensivista  
Jefe UCI Servclínicos Dromedica de Bucaramanga  
Presidente AMCI Regional Santander

**Iván Augusto Gaona Barbosa**

MD Neurólogo, Especialista en Neurofisiología y  
Epilepsia. Hospital Infantil Universitario San José  
Fundación CardiInfantil  
Presidente Liga Colombiana contra Epilepsia

**Martha Liliana Sánchez Lozano**

MD Especialista en Medicina Crítica y Cuidado Intensivo  
Clínica San Rafael Pereira

**Hans Fred García Araque**

MD Anesthesiologo Cardiovascular e Intensivista, Hospital  
Militar Central  
Coordinador Posgrado Anestesia Universidad Militar  
Nueva Granada

**Juan Luis Echeverry**

Medicina General. CES. Especialista en Medicina  
Interna, Especialista en medicina crítica y cuidado  
intensivo. UPB. Especialista en gerencia de instituciones  
de salud de la universidad EAFIT

**Juan David Uribe Molano**

MD Internista, Cuidado Intensivo  
Jefe de departamento de cuidado critico  
Coordinador ECMO  
Coordinador Soporte Nutricional Clínica Cardio VID  
Docente pregrado Medicina Interna Universidad  
Pontificia Bolivariana  
Docente pregrado de nutrición Escuela de ciencias de la  
nutrición CES

**Ninel de Jesús Barrios Torres**

MD Especialista en Medicina Crítica y Cuidados  
Intensivos  
Coordinadora UCIA Clínica Especializada la Concepción

**Lilian Torregrosa**

MD, directora del Dpto. de Cirugía Universidad Javeriana,  
hospital San Ignacio  
Presidente de la Sociedad Colombiana De Cirugía

**Edward García**

MD Anesthesiologo Intensivista  
Clínica Las Américas Medellín

**Víctor Hugo Nieto Estrada**

MD Internista Intensivista  
Epidemiólogo clínico  
Director Grupo Investigación GriBos  
Profesor Fundación Universitaria Sanitas  
Profesor Ad honorem Universidad el Bosque

**Carlos Alberto Danetra**

MD Especialista en Medicina Crítica y cuidado Intensivo  
Especialista en Medicina Interna  
Coordinador UCI Clínica General del Norte

**Mario Alberto Lora Andosilla**

MD Internista Intensivista  
Universidad de Cartagena

**Leopoldo Ferrer**

MD Anesthesiologo Intensivista  
Fundación Santa Fe de Bogotá  
Fellowship Research Ventilación Mecánica  
Universidad de Minnesota  
Profesor Medicina Crítica y Cuidados intensivos  
Universidad del Rosario  
Profesor Anestesia Universidad El Bosque  
Profesor Medicina Universidad de los Andes

**Juan Carlos Díaz Cortés**

MD, MSc, Anesthesiologo de la Universidad El Bosque /  
Fundación Santa Fe de Bogotá  
Cuidado Intensivo de la Universidad del Rosario  
Maestría en Epidemiología de la Universidad del Rosario  
y Universidad CES  
Intensivista Clínica de Marly, Jorge Cavelier Gaviria, Chía.

**Daniel Alberto Villamizar Olaya**

MD especialista en geriatría universidad nacional de  
Colombia. Geriatra fundación cardiovascular de  
Colombia-instituto cardiovascular. Miembro grupo de  
investigación en cardiogeriatría INCARGET



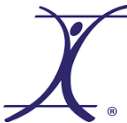

Supplement: mmc2 [file S0122726220300859:mmc2.pdf]
