# Supplementary material
Source: Elsevier journal article supplement (https://www.sciencedirect.com/science/article/pii/S0122726220300859)
Supplement: mmc1 [file S0122726220300859:mmc1.pdf]

Tabla 1. Resumen ejecutivo de recomendaciones actualización consenso COVID-19 AMCI.

| TABLA 1. Resumen de las recomendaciones                                                                                                                                                                                                                                                                                                                                                                                                                                                                                                                                                                                                                                                                                                                                                                                                                                                                                                                                                                                                                                                                                                                                                                                                                                                                                                                                                                                                                                                                                                                                                                                                                                                                                                                                                        |             |                      |            |                |
|------------------------------------------------------------------------------------------------------------------------------------------------------------------------------------------------------------------------------------------------------------------------------------------------------------------------------------------------------------------------------------------------------------------------------------------------------------------------------------------------------------------------------------------------------------------------------------------------------------------------------------------------------------------------------------------------------------------------------------------------------------------------------------------------------------------------------------------------------------------------------------------------------------------------------------------------------------------------------------------------------------------------------------------------------------------------------------------------------------------------------------------------------------------------------------------------------------------------------------------------------------------------------------------------------------------------------------------------------------------------------------------------------------------------------------------------------------------------------------------------------------------------------------------------------------------------------------------------------------------------------------------------------------------------------------------------------------------------------------------------------------------------------------------------|-------------|----------------------|------------|----------------|
|                                                                                                                                                                                                                                                                                                                                                                                                                                                                                                                                                                                                                                                                                                                                                                                                                                                                                                                                                                                                                                                                                                                                                                                                                                                                                                                                                                                                                                                                                                                                                                                                                                                                                                                                                                                                | Mediana(Q1) | Expertos a favor (%) | Neutro (%) | Desacuerdo (%) |
| <b>I. Abordaje organizacional</b>                                                                                                                                                                                                                                                                                                                                                                                                                                                                                                                                                                                                                                                                                                                                                                                                                                                                                                                                                                                                                                                                                                                                                                                                                                                                                                                                                                                                                                                                                                                                                                                                                                                                                                                                                              |             |                      |            |                |
| <p><b>1.¿En Unidades de Cuidados Intensivos de Adultos que deben atender pacientes con COVID 19, centralizar el manejo de los pacientes Covid-19 comparado con otros modelos aumenta la seguridad para los pacientes y/o los equipos de atención?</b></p> <p>Se recomienda que los prestadores de servicios de acuerdo con su infraestructura física y la disponibilidad de recursos (tecnológico, humano, de interdependencia y apoyo) definan su modelo de atención para pacientes con COVID-19 en estado crítico basado en principios de factibilidad, efectividad, seguridad y la relación entre la demanda (momento epidemiológico) y capacidad/capacidades de respuesta:</p> <p>Modelo 1. Atención de pacientes con sospecha o confirmación diagnóstica COVID-19. Este enfoque permite concentrar, optimizar y racionalizar recursos y reducir el riesgo potencial de contagio al equipo de atención, de apoyo y de pacientes.</p> <p>Modelo 2. Atención mixta, de pacientes con y sin diagnóstico de COVI-19, en escenarios que cuentan con unidades de aislamiento normatizados (presión negativa y &gt;12-renovaciones completas de aire por hora) soportado en el documento institucional de gestión organizacional y operativo del servicio de cuidados intensivos, descrito en los procesos prioritarios.</p> <p>Modelo 3. Atención mixta y polivalente, de pacientes con y sin COVID-19 en espacios con barrera física (piso, techo), puerta hermética de vidrio y un protocolo de atención que minimice el riesgo de contagio al equipo sanitario y a los pacientes no COVID-19. Por alto riesgo de contagio este modelo debe ser avalado por la dirección seccional de salud y el ingreso del paciente debe ser bajo consentimiento informado.</p> <p><b>Fuerte a favor</b></p> | 9 (8)       | 100%                 | 0%         | 0%             |

|                                                                                                                                                                                                                                                                                                                                                                                                                                                                                                                                                                                                                                                                                                                                                                                                    |       |     |     |    |
|----------------------------------------------------------------------------------------------------------------------------------------------------------------------------------------------------------------------------------------------------------------------------------------------------------------------------------------------------------------------------------------------------------------------------------------------------------------------------------------------------------------------------------------------------------------------------------------------------------------------------------------------------------------------------------------------------------------------------------------------------------------------------------------------------|-------|-----|-----|----|
|                                                                                                                                                                                                                                                                                                                                                                                                                                                                                                                                                                                                                                                                                                                                                                                                    |       |     |     |    |
| <p><b>2.¿Existe una estrategia preferencial para incrementar la capacidad instalada de cuidados intensivos sin afectar la calidad del servicio clínico durante la pandemia por COVID-19?</b></p> <p>Se recomienda la expansión de la capacidad de cuidados críticos más allá de la oferta inicialmente habilitada, forzada por el estado de emergencia atribuido a la pandemia COVID-19, pero adaptada (aproximada) a los requisitos normativos y de ser posible bajo el liderazgo del especialista en medicina crítica y cuidados intensivos (presencial o por telesalud), con un equipo multidisciplinario capacitado (acciones de formación continua) que garantice efectividad y seguridad en la atención.<br/> <b>Fuerte a favor</b></p>                                                      | 9 (9) | 98% | 0%  | 2% |
| <p><b>3.¿Para la atención de pacientes adultos con COVID-19 en UCI, la predicción matemática de casos permite establecer la proyección de los recursos de oferta hospitalaria?</b></p> <p>Se recomienda la adopción de un modelo simulado de predicción (basado en el cociente de fatalidad, tasa de ingreso a UCI y el número de reproducción Ro) para proyectar, de manera anticipada las necesidades de recurso físico, tecnológico y humano de cuidados críticos en fase de preparación de la pandemia por COVID-19.<br/> <b>Fuerte a favor</b></p>                                                                                                                                                                                                                                            | 8 (7) | 86% | 8%  | 6% |
| <p><b>4.¿Para los pacientes adultos hospitalizados en camas de expansión de cuidados intensivos que no cuentan con intensivista presencial durante la pandemia COVID 19, estrategias de soporte de telesalud (TS) ofrece ventajas en cuanto a la calidad en la atención clínica?</b></p> <p>Se sugiere la implementación de una estrategia de telesalud (TS): teleapoyo o teleexperticia, en el marco de la pandemia COVID-19, cuando no se cuente con un intensivista presencial, que mediante una tecnología adecuada, complementa la atención en las áreas de cuidados críticos realizado por personal capacitado. Aun cuando es considerada ventajosa sus implicaciones en términos de resultados clínicos, económicos y de riesgos legales no se ha demostrado.<br/> <b>Débil a favor</b></p> | 8 (7) | 79% | 15% | 6% |

|                                                                                                                                                                                                                                                                                                                                                                                                                                                                                                                                                                                                                                                                                                                                                                                                                                                                                                                                                                                                       |       |     |     |    |
|-------------------------------------------------------------------------------------------------------------------------------------------------------------------------------------------------------------------------------------------------------------------------------------------------------------------------------------------------------------------------------------------------------------------------------------------------------------------------------------------------------------------------------------------------------------------------------------------------------------------------------------------------------------------------------------------------------------------------------------------------------------------------------------------------------------------------------------------------------------------------------------------------------------------------------------------------------------------------------------------------------|-------|-----|-----|----|
| <p><b>5.¿El manejo liderado por intensivistas para pacientes adultos críticos con COVID 19 comparado con el manejo liderado por un especialista no intensivista mejora el resultado clínico definitivo?</b></p> <p>Se recomienda la implementación de un modelo de cuidados críticos COVID-19 liderado por intensivistas, en áreas habilitadas o adaptadas, con el beneficio preponderante de disminuir la mortalidad, tiempo de estancia y optimización de recursos.</p> <p><b>Fuerte a favor</b></p> <p>Se recomienda una cobertura por intensivistas de al menos 12 horas diarias y un cociente intensivista/paciente cercano a 1 intensivista por cada 8-10 pacientes, basado en la alta complejidad de la enfermedad crítica COVID-19 con un alto porcentaje de pacientes en ventilación mecánica, largos tiempos de estancia y alto riesgo de mortalidad.</p> <p><b>Fuerte a favor</b></p>                                                                                                      | 9 (8) | 98% | 2%  | 0% |
| <p><b>6.¿En pacientes adultos que ingresan al departamento de urgencias con sospecha o diagnóstico de infección por COVID-19, la escala NEWS comparado con otras escalas, tiene mejor capacidad predictiva para definir la necesidad de ingreso a UCI o la probabilidad de muerte?</b></p> <p>Se recomienda la aplicación de la escala NEWS-2 por parte de un equipo de respuesta rápida, para establecer el lugar de atención de pacientes con diagnóstico definitivo o sospecha de infección por COVID-19 que encuentran en los servicios de urgencias o de hospitalización.</p> <p><b>Fuerte a favor</b></p> <p>Se recomiendan escalas como el qSOFA y el CURB-65 para apoyar la decisión tomada con base en la escala NEWS-2. Sin embargo, un qSOFA mayor o igual a 2 puntos (mínimo 2/3) y un CRB-65 mayor o igual 2 puntos tienen baja sensibilidad (<i>alta incidencia de falsos negativos</i>) para identificar pacientes que puedan requerir ingreso a UCI.</p> <p><b>Fuerte a favor</b></p> | 8 (7) | 84% | 14% | 2% |

|                                                                                                                                                                                                                                                                                                                                                                                                                                                                                                                                                                                                                                                                                                                                                                                                                                                                                                                                                                                                                                                        |       |     |    |    |
|--------------------------------------------------------------------------------------------------------------------------------------------------------------------------------------------------------------------------------------------------------------------------------------------------------------------------------------------------------------------------------------------------------------------------------------------------------------------------------------------------------------------------------------------------------------------------------------------------------------------------------------------------------------------------------------------------------------------------------------------------------------------------------------------------------------------------------------------------------------------------------------------------------------------------------------------------------------------------------------------------------------------------------------------------------|-------|-----|----|----|
| <p>Se recomienda el score de riesgo COVID-19-GRAM para identificar el riesgo de desarrollar un estado de la enfermedad crítico en pacientes con COVID-19 y como herramienta complementaria a la escala NEWS-2 en escenarios de alta demanda y escasez de recursos, de manera que la decisión de ingreso a UCI se haga sobre aquellos pacientes que realmente se beneficiarán de la misma en términos de vidas salvadas y número de años salvados.</p> <p><b>Fuerte a favor</b></p>                                                                                                                                                                                                                                                                                                                                                                                                                                                                                                                                                                     |       |     |    |    |
| <p><b>7.¿La aplicación de algoritmos de decisiones y modelos independientes a las escalas clínicas en COVID-19 es útil para determinar el ingreso a UCI y progresión de la enfermedad?</b></p> <p>Se recomienda la aplicación de un algoritmo basado en una evaluación dinámica del Score News 2 que involucre una escala de evaluación funcional, para priorizar el ingreso a UCI con transparencia científica y ética con equidad social, y de ser posible respaldado por un comité de priorización Clínica (CPC) integrado por expertos de cuidado intensivo y un representante del comité de ética hospitalaria durante la pandemia por COVID-19.</p> <p><b>Fuerte a favor</b></p> <p>Se recomienda un modelo determinado por 4 prioridades para definir criterios de ingreso a UCI, el cual permite establecer rápidamente qué pacientes se benefician de ingreso UCI y qué pacientes deben permanecer en servicios de hospitalización, o con acompañamiento familiar y cuales con medidas de cuidado paliativo.</p> <p><b>Fuerte a favor</b></p> | 8 (7) | 90% | 6% | 4% |
| <p><b>8.¿En el paciente adulto con sospecha o diagnóstico confirmado de COVID-19 la decisión de egreso de la unidad de cuidados intensivos a otras áreas debe basarse en escalas de severidad o criterios de egreso aplicados al paciente crítico No COVID-19?</b></p> <p>Se recomienda no usar escalas de severidad de enfermedad (criterios objetivos) para definir el traslado de pacientes de UCI hacia un nivel de menor complejidad de atención, ya que estas escalas no han sido validadas para este uso.</p> <p><b>Fuerte en contra</b></p>                                                                                                                                                                                                                                                                                                                                                                                                                                                                                                    | 9 (8) | 88% | 6% | 6% |

|                                                                                                                                                                                                                                                                                                                                                                                                                                                                                                                                                                                                                                                                                                                                                                                                                                                                                                                                                                                                                                                                                                                                                                                                                                                                                                                                                                                                                                            |       |     |     |    |
|--------------------------------------------------------------------------------------------------------------------------------------------------------------------------------------------------------------------------------------------------------------------------------------------------------------------------------------------------------------------------------------------------------------------------------------------------------------------------------------------------------------------------------------------------------------------------------------------------------------------------------------------------------------------------------------------------------------------------------------------------------------------------------------------------------------------------------------------------------------------------------------------------------------------------------------------------------------------------------------------------------------------------------------------------------------------------------------------------------------------------------------------------------------------------------------------------------------------------------------------------------------------------------------------------------------------------------------------------------------------------------------------------------------------------------------------|-------|-----|-----|----|
| <p>Se recomienda en la atención por COVID-19 en cuidados intensivos utilizar los mismos criterios de egreso que se emplean para el traslado desde UCI hacia una unidad de menor complejidad de pacientes sin infección por COVID-19.</p> <p><b>Fuerte a favor</b></p> <p>Se recomienda contar con áreas de bajo nivel de complejidad asignadas solo a la atención de paciente con infección por COVID-19, las cuales serán las áreas hacia donde se realiza el de-escalamiento gradual de los pacientes basado en su evolución clínica.</p> <p><b>Fuerte a favor</b></p>                                                                                                                                                                                                                                                                                                                                                                                                                                                                                                                                                                                                                                                                                                                                                                                                                                                                   |       |     |     |    |
| <p><b>9.¿En contexto de la pandemia una demanda que supere la oferta de cuidados intensivos cambiar los criterios tradicionales de egreso a parámetros más flexibles permitirá ser más eficientes en la gestión de la demanda?</b></p> <p>Se recomienda para pacientes con COVID-19 que evolucionan hacia la mejoría, utilizar los criterios clásicos de desescalamiento del nivel de atención (unidad de cuidados intermedios o sala de hospitalización) que propone el <i>Colegio Americano de Cuidado Intensivo</i>(53)</p> <p><b>Fuerte a favor</b></p> <p>Se recomienda aplicar la escala SOFA al menos cada 48 horas, sumado al criterio de fragilidad y años de vida saludables salvados estos criterios podrían ser válidos en pacientes con fallo terapéutico a las medidas óptimas y orientar decisiones de desescalamiento de medidas y de nivel de complejidad de atención cuando la demanda potencial supera la oferta (capacidad y capacidades), estas decisiones deben ser tomadas idealmente en junta médica.</p> <p><b>Fuerte a favor</b></p> <p>Se recomienda generar procesos administrativos más eficientes para el traslado de pacientes fuera de la UCI hacia niveles de menor complejidad, estos ayudarán a liberar recursos para otros pacientes.</p> <p><b>Fuerte a favor</b></p> <p>Se recomienda no utilizar el resultado de la RT-PCR positiva para decidir el egreso de la unidad de cuidados intensivos.</p> | 8 (7) | 84% | 10% | 6% |

|                                                                                                                                                                                                                                                                                                                                                                                                                                                                                                                                                                                                                                                                                                                                                                                                                                                                                                                                                                                                                                                                                                                                                                                                                                                                                                                                                                                                                                                                 |       |     |    |    |
|-----------------------------------------------------------------------------------------------------------------------------------------------------------------------------------------------------------------------------------------------------------------------------------------------------------------------------------------------------------------------------------------------------------------------------------------------------------------------------------------------------------------------------------------------------------------------------------------------------------------------------------------------------------------------------------------------------------------------------------------------------------------------------------------------------------------------------------------------------------------------------------------------------------------------------------------------------------------------------------------------------------------------------------------------------------------------------------------------------------------------------------------------------------------------------------------------------------------------------------------------------------------------------------------------------------------------------------------------------------------------------------------------------------------------------------------------------------------|-------|-----|----|----|
| <b>Fuerte en contra</b>                                                                                                                                                                                                                                                                                                                                                                                                                                                                                                                                                                                                                                                                                                                                                                                                                                                                                                                                                                                                                                                                                                                                                                                                                                                                                                                                                                                                                                         |       |     |    |    |
| <p><b>10.¿En fase de pandemia la disposición final del cadáver de todo paciente fallecido con sospecha o diagnóstico de COVID-19 mediante cremación es más segura comparándolo con un protocolo de inhumación tradicional?</b></p> <p>Se recomienda que la disposición final de cadáveres de personas con sospecha o diagnóstico de COVID-19 se haga preferiblemente por cremación. En tal caso, las cenizas pueden ser objeto de manipulación sin que suponga ningún riesgo.</p> <p><b>Fuerte a favor</b></p> <p>Se recomienda que la disposición final del cadáver se haga por inhumación en sepultura o bóveda individualizada cuando no se cuente con instalaciones para cremación en el territorio donde ocurrió el deceso o la disponibilidad de esta tecnología desborda la capacidad económica de las personas</p> <p><b>Fuerte a favor</b></p> <p>Se recomienda realizar siempre el aislamiento del cadáver en el lugar del deceso, siguiendo las recomendaciones del Ministerio de Salud y la Protección Social (MSPS).</p> <p><b>Fuerte a favor</b></p> <p>Se recomienda que en los casos que se requiera necropsia médico legal y estuviese indicada la cremación, esta deberá contar con la orden del fiscal del caso.</p> <p><b>Fuerte a favor</b></p> <p>Se recomienda que la institución establezca en sus procesos prioritarios un protocolo humanizado de despedida bajo estrictos criterios de bioseguridad</p> <p><b>Fuerte a favor</b></p> | 9(8)  | 96% | 4% | 0% |
| <p><b>11.¿En la atención del paciente adulto con sospecha o diagnóstico de COVID-19, el trabajo integrado de los líderes de la atención médica Institucional (Intensivista, comité de ética, otros comités, dirección, gerencia) influyen en los resultados de los pacientes atendidos en UCI y en la seguridad para el personal sanitario?</b></p>                                                                                                                                                                                                                                                                                                                                                                                                                                                                                                                                                                                                                                                                                                                                                                                                                                                                                                                                                                                                                                                                                                             | 9 (8) | 94% | 4% | 2% |

|                                                                                                                                                                                                                                                                                                                                                                                                                                                                                                                                                                                                                                                                                                                                                                                                                                                                                                                                                                                                                                                                                                                                                                                                                                                                                                                                                                                                                                                                                                                                                                                                    |         |     |     |     |
|----------------------------------------------------------------------------------------------------------------------------------------------------------------------------------------------------------------------------------------------------------------------------------------------------------------------------------------------------------------------------------------------------------------------------------------------------------------------------------------------------------------------------------------------------------------------------------------------------------------------------------------------------------------------------------------------------------------------------------------------------------------------------------------------------------------------------------------------------------------------------------------------------------------------------------------------------------------------------------------------------------------------------------------------------------------------------------------------------------------------------------------------------------------------------------------------------------------------------------------------------------------------------------------------------------------------------------------------------------------------------------------------------------------------------------------------------------------------------------------------------------------------------------------------------------------------------------------------------|---------|-----|-----|-----|
| <p>Se recomienda que el trabajador de la salud conozca a través de la Institución donde labora, los riesgos éticos, de salud y seguridad a que se expone por la atención en el paciente COVID-19, evitando así conflictos e incertidumbres que afecten la atención.</p> <p><b>Fuerte a favor</b></p> <p>Se recomienda que las instituciones prestadoras de salud a través de los líderes de atención médica guíen y orienten a los trabajadores, para ofrecer una mejor atención médica y menor daño emocional durante la pandemia.</p> <p><b>Fuerte a favor</b></p> <p>Se recomienda dar a conocer las directrices institucionales sobre el nivel de atención (UCI vs. sala médica); inicio del tratamiento de soporte vital (incluyendo RCP y soporte de ventilación); retirada del tratamiento de soporte vital; y derivación a cuidados paliativos (centrados en la comodidad) en la atención médica de los pacientes durante la pandemia, esto genera una atención caracterizada por alivio del sufrimiento, no abandono, respeto a los derechos y preferencias de los pacientes, igualdad moral de las personas y la equidad en la distribución de riesgos y beneficios en la sociedad.</p> <p><b>Fuerte a favor</b></p> <p>El apoyo de la práctica ética es necesario integrarlo al cuidado de la salud y al bienestar de la fuerza laboral del cuidado en salud. Reconociendo los desafíos especiales a que se enfrentan al responder al COVID-19. Esto forma parte del liderazgo en la atención médica y del servicio del deber cívico.</p> <p><b>Punto de buena práctica clínica</b></p> |         |     |     |     |
| <p><b>12.¿Pueden ser utilizado en los pacientes con sospecha o diagnóstico de COVID-19 críticamente enfermos los llamados tratamientos compasivos conociendo su limitada evidencia en la emergencia de la pandemia?</b></p> <p>No se puede emitir una recomendación a favor o en contra acerca del uso de los medicamentos y dispositivos “prototipos” utilizados en el manejo del COVID-19 denominados de uso compasivo o fuera de etiqueta, se considera sin embargo que no pueden ser utilizados por fuera de ensayos clínicos o protocolos institucionales estandarizados de</p>                                                                                                                                                                                                                                                                                                                                                                                                                                                                                                                                                                                                                                                                                                                                                                                                                                                                                                                                                                                                               | 8,5 (5) | 72% | 14% | 14% |

|                                                                                                                                                                                                                                                                                                                                                                                                                                                                                                                                                                                                                                                                                                                                                                                                                                                                                                                                                                                                                                                                                                                                                                                                                                                                                                                                                                                                   |       |     |    |    |
|---------------------------------------------------------------------------------------------------------------------------------------------------------------------------------------------------------------------------------------------------------------------------------------------------------------------------------------------------------------------------------------------------------------------------------------------------------------------------------------------------------------------------------------------------------------------------------------------------------------------------------------------------------------------------------------------------------------------------------------------------------------------------------------------------------------------------------------------------------------------------------------------------------------------------------------------------------------------------------------------------------------------------------------------------------------------------------------------------------------------------------------------------------------------------------------------------------------------------------------------------------------------------------------------------------------------------------------------------------------------------------------------------|-------|-----|----|----|
| evaluación del perfil de riesgo/beneficio y bajo la aplicación de consentimiento informado.                                                                                                                                                                                                                                                                                                                                                                                                                                                                                                                                                                                                                                                                                                                                                                                                                                                                                                                                                                                                                                                                                                                                                                                                                                                                                                       |       |     |    |    |
| <p><b>13.¿La comunicación inicial con los familiares del paciente adulto con sospecha o diagnóstico de COVID-19 críticamente enfermo debe incluir, información clara y transparente sobre derechos al final de la vida, proporcionalidad, adecuación del esfuerzo terapéutico, así como la documentación de voluntades anticipadas y atención paliativa?</b></p> <p>Se recomienda en la comunicación inicial con los familiares del paciente adulto con sospecha o diagnóstico de COVID-19 críticamente enfermo incluir de forma clara y transparente los aspectos relacionados con el derecho al final de la vida que incluye: proporcionalidad en el tratamiento, adecuación del esfuerzo terapéutico, documento de voluntad anticipada, adecuación del esfuerzo terapéutico y la atención paliativa. Situaciones estas que se pueden presentar durante la evolución hospitalaria y que requieren de una decisión conjunta entre el médico y el familiar del paciente.</p> <p><b>Fuerte a favor</b></p> <p>Se recomienda dar una información específica, y adecuada a los familiares del paciente con sospecha o diagnóstico de COVID-19, para que firmen el consentimiento informado, generando esta información confianza y comprensión en el familiar. La información del consentimiento que recibe el familiar debe constar dentro de la historia clínica.</p> <p><b>Fuerte a favor</b></p> | 9 (9) | 96% | 2% | 2% |
| <p><b>14.¿Se debe tener un consentimiento informado al ingreso hospitalario del paciente con sospecha o diagnóstico de COVID-19 críticamente enfermo?</b></p> <p>Se recomienda tener un consentimiento informado al ingreso hospitalario del paciente COVID-19, se deben tener en cuenta las circunstancias del paciente al ingreso hospitalario, si la capacidad para la toma de decisiones está limitada por su estado clínico o incapacidad mental. De ser estas las circunstancias se dará la información al familiar en primera línea de consanguinidad quien asume por el paciente el consentimiento de la información (consentimiento sustituto).</p>                                                                                                                                                                                                                                                                                                                                                                                                                                                                                                                                                                                                                                                                                                                                      | 9 (8) | 98% | 0% | 2% |



|                                                                                                                                                                                                                                                                                                                                                                                                                                                                                                                                                                                                                                                                                                                                                                                                                                                                                                                                                                                                                                                                                                                                                     |       |     |     |    |
|-----------------------------------------------------------------------------------------------------------------------------------------------------------------------------------------------------------------------------------------------------------------------------------------------------------------------------------------------------------------------------------------------------------------------------------------------------------------------------------------------------------------------------------------------------------------------------------------------------------------------------------------------------------------------------------------------------------------------------------------------------------------------------------------------------------------------------------------------------------------------------------------------------------------------------------------------------------------------------------------------------------------------------------------------------------------------------------------------------------------------------------------------------|-------|-----|-----|----|
| <p><b>Fuerte a favor</b></p> <p>Se recomienda tener el consentimiento informado en situaciones de excepción o urgencia ante la pandemia por COVID-19, debe ser universal, en el que se informe el ingreso a la UCI, o a cualquier otra área hospitalaria, realización de procedimientos, administración de tratamientos, posibles riesgos, beneficios durante su hospitalización. Con esto se respeta el derecho a la autonomía personal en el paciente competente. En caso contrario el familiar tomará la información y asume el consentimiento a la información dada. Es importante que el familiar esté informado de las decisiones que se vayan tomando durante la evolución hospitalaria (realización de procedimientos, inicios o cambios de tratamientos, movilización dentro del área hospitalaria. Etc.)</p> <p><b>Fuerte a favor</b></p>                                                                                                                                                                                                                                                                                                 |       |     |     |    |
| <p><b>15.¿En el paciente con sospecha o diagnóstico de COVID-19 la decisión de reorientar el esfuerzo terapéutico por parte del médico tratante debe ser soportada por directrices del comité de ética o con la realización de una junta médica o la decisión consultada con la familia?</b></p> <p>Se sugiere ante la pandemia del COVID-19, si es posible, que el grupo de expertos en bioética y/o comité de ética institucional sean consultados y estén informados por el médico responsable para la orientación o consejo en la toma de directrices ante decisiones difíciles.</p> <p><b>Débil a favor</b></p> <p>Se sugiere en lo posible que el médico tratante no asuma solo la responsabilidad moral y que la decisión sea institucional y documentada en la historia clínica e informada a los familiares. En caso de no contar con un comité de bioética y/o ética hospitalaria el médico responsable podrá tomar la decisión fundamentada en principios éticos y derechos del paciente o convocar a una junta médica u otro comité relacionado con su dilema o consultar un apoyo externo en bioética.</p> <p><b>Débil a favor</b></p> | 8 (7) | 78% | 14% | 8% |
| <p><b>16.¿En un paciente con sospecha o diagnóstico de COVID-19 que puede beneficiarse al incluirlo en un ensayo clínico y no hay opción de firmar un consentimiento</b></p>                                                                                                                                                                                                                                                                                                                                                                                                                                                                                                                                                                                                                                                                                                                                                                                                                                                                                                                                                                        | 9 (8) | 90% | 8%  | 2% |

|                                                                                                                                                                                                                                                                                                                                                                                                                                                                                                                                                                                                                                                                                                                                                                                                                                                                                                                                                                                                                                                                                    |       |     |    |    |
|------------------------------------------------------------------------------------------------------------------------------------------------------------------------------------------------------------------------------------------------------------------------------------------------------------------------------------------------------------------------------------------------------------------------------------------------------------------------------------------------------------------------------------------------------------------------------------------------------------------------------------------------------------------------------------------------------------------------------------------------------------------------------------------------------------------------------------------------------------------------------------------------------------------------------------------------------------------------------------------------------------------------------------------------------------------------------------|-------|-----|----|----|
| <p><b>informado, que debemos de conocer para poderlo incluir al estudio?</b></p> <p>Se recomienda que todo ensayo clínico que se realice en la institución debe ser presentado, revisado y aceptado por un comité de investigación local o un comité de investigación externo nacional o internacional.</p> <p><b>Fuerte a favor</b></p> <p>Se recomienda que todo paciente que se incluya en un ensayo clínico debe contar con un consentimiento informado el cual garantiza la aceptación voluntaria a participar y la comprensión de los objetivos, riesgos, beneficios, derechos y responsabilidades que tiene dentro de la investigación.</p> <p><b>Fuerte a favor</b></p> <p>Se recomienda el consentimiento informado en todo ensayo clínico, el cual debe ser individual en tiempos de normalidad como en tiempos de pandemia por COVID-19. Solo el comité de ética en investigación podrá establecer en tiempos de normalidad o de pandemia las condiciones de dispensa o excepción al requisito de obtener el consentimiento informado.</p> <p><b>Fuerte a favor</b></p> |       |     |    |    |
| <p><b>17.¿En el paciente con sospecha o diagnóstico de COVID-19 con pronóstico de no recuperación debe hacerse la transición al manejo paliativo y recibir control de síntomas?</b></p> <p>Se recomienda considerar la transición del cuidado intensivo al cuidado paliativo en todo paciente con sospecha o diagnóstico de COVID-19 sin mejoría a pesar de las intervenciones óptimas, con empeoramiento progresivo de su pronóstico vital y ante un evidente deterioro; aplicando medidas generales en control de síntomas ( manejo de secreciones - tratamiento del dolor - tratamiento de la disnea - sedación paliativa), así como apoyo espiritual, siempre acompañando al paciente y nunca abandonarlo en el final de la vida.</p> <p><b>Fuerte a favor</b></p>                                                                                                                                                                                                                                                                                                             | 9 (8) | 88% | 6% | 6% |
| <p><b>18.¿En la atención del paciente con sospecha o diagnóstico de COVID-19 en situación de terminalidad en la UCI se deben aplicar las guías de Fin de Vida previas o generar o utilizar</b></p>                                                                                                                                                                                                                                                                                                                                                                                                                                                                                                                                                                                                                                                                                                                                                                                                                                                                                 | 9 (8) | 96% | 4% | 0% |

|                                                                                                                                                                                                                                                                                                                                                                                                                                                                                                                                                                                                                                                                                                                                                                                                                                                                                                                                                                                                                                                                                                                                                                                                                                                                          |       |     |    |    |
|--------------------------------------------------------------------------------------------------------------------------------------------------------------------------------------------------------------------------------------------------------------------------------------------------------------------------------------------------------------------------------------------------------------------------------------------------------------------------------------------------------------------------------------------------------------------------------------------------------------------------------------------------------------------------------------------------------------------------------------------------------------------------------------------------------------------------------------------------------------------------------------------------------------------------------------------------------------------------------------------------------------------------------------------------------------------------------------------------------------------------------------------------------------------------------------------------------------------------------------------------------------------------|-------|-----|----|----|
| <p><b>nuevas guías emanadas o modificadas en medio de la pandemia?</b></p> <p>Se recomienda la utilización de guías establecidas previamente a la pandemia por el ministerio de salud y sociedades científicas para orientar las decisiones que se tomen al final de la vida en pacientes con sospecha o diagnóstico de COVID-19. Estas guías deben ser divulgadas al equipo de atención y aplicadas en los pacientes en casos de: adecuación del esfuerzo terapéutico (AET), orden de no reanimar (ONR), consentimiento sustituto, voluntades anticipadas, cuidados paliativos.</p> <p><b>Fuerte a favor</b></p> <p>Se recomienda fundamentar las decisiones del final de la vida individualizadas a cada paciente y a cada situación sin llegar a tomar decisiones apresuradas sin fundamento científico o ético, solicitando de ser posible una valoración por medicina paliativa para el manejo de síntomas.</p> <p><b>Fuerte a favor</b></p> <p>Se recomienda indagar durante la hospitalización de todo paciente con sospecha o diagnóstico de COVID-19, si en tiempos de salud hizo válida su autonomía y realizó un documento de voluntad anticipada, teniendo en cuenta que esta será equivalente al consentimiento informado.</p> <p><b>Fuerte a favor</b></p> |       |     |    |    |
| <p><b>19.¿En pacientes con sospecha o diagnóstico de COVID-19 las instituciones deben brindar un programa de atención paliativa a aquellos pacientes no aptos de ingreso a UCI para que se beneficien de cuidados del final de la vida y una muerte digna?</b></p> <p>Se recomienda que el paciente crítico con COVID-19 que no es candidato para ingresar o continuar recibiendo cuidados intensivos y que presente deterioro rápido con mal pronóstico a corto plazo, se le brinde una adecuación del esfuerzo terapéutico orientada a acompañamiento al final de la vida, alivio del sufrimiento y control de síntomas. Dependiendo de la disponibilidad de recursos se sugiere dentro del plan de atención hospitalaria contar con un área destinada a la atención del final de vida con el recurso físico, humano y de procesos necesario.</p> <p><b>Fuerte a favor</b></p>                                                                                                                                                                                                                                                                                                                                                                                         | 9 (9) | 96% | 2% | 2% |

|                                                                                                                                                                                                                                                                                                                                                                                                                                                                                                                                                                                                                                                                                                                                                                                                            |       |     |     |     |
|------------------------------------------------------------------------------------------------------------------------------------------------------------------------------------------------------------------------------------------------------------------------------------------------------------------------------------------------------------------------------------------------------------------------------------------------------------------------------------------------------------------------------------------------------------------------------------------------------------------------------------------------------------------------------------------------------------------------------------------------------------------------------------------------------------|-------|-----|-----|-----|
| <p><b>20.¿Se debería considerar el uso continuo del respirador N95 o similares durante la jornada de trabajo en la atención de pacientes con COVID-19 en las unidades de cuidados intensivos sin presión negativa y con cubículos abiertos?</b></p> <p>Se recomienda como estrategia de protección personal en las unidades de cuidado intensivo sin presión negativa y cubículos abiertos utilizar de forma continua el respirador N95 o FFP2, adicional a otros elementos de protección para prevención del contagio por COVID-19.</p> <p><b>Fuerte a favor</b></p>                                                                                                                                                                                                                                      | 9 (8) | 92% | 8%  | 0%  |
| <p><b>21.¿Con el tiempo de uso extendido o intermitente del respirador N95 más allá de la recomendación del fabricante durante la atención del paciente con COVID-19 se conserva la efectividad de la protección para el personal sanitario o de apoyo?</b></p> <p>No se puede emitir una recomendación a favor o en contra acerca de la efectividad de bioseguridad del uso extendido o intermitente de los respiradores N95 ó FFP2. Sin embargo, se considera que puede ser una alternativa, bajo la adopción de un protocolo riguroso, cuando se debe optimizar el uso de los EPP en el contexto de un acceso limitado. El reúso no está permitido en Colombia.</p>                                                                                                                                     | 7 (5) | 57% | 29% | 14% |
| <p><b>22.¿Existe superioridad en términos de protección personal para el personal sanitario y de apoyo dentro de las unidades de cuidados intensivos con la utilización del overol frente a la bata manga larga con antifuído durante la atención del paciente con COVID-19?</b></p> <p>No se puede emitir una recomendación a favor o en contra si los overoles ofrecen mayor protección por cobertura corporal frente a otros elementos como vestidos largos, batas y delantales. Resulta intuitivo que su uso genera una mayor protección en especial en servicios cohortizados. Sin embargo, su uso está asociado con una mayor dificultad para su colocación y retiro, lo que puede potencializar el contagio del usuario, la utilización debe hacerse bajo un protocolo supervisado y chequeado.</p> | 8 (6) | 74% | 12% | 14% |

|                                                                                                                                                                                                                                                                                                                                                                                                                                                                                                                                                                                                                                                                                                                                                    |       |     |     |    |
|----------------------------------------------------------------------------------------------------------------------------------------------------------------------------------------------------------------------------------------------------------------------------------------------------------------------------------------------------------------------------------------------------------------------------------------------------------------------------------------------------------------------------------------------------------------------------------------------------------------------------------------------------------------------------------------------------------------------------------------------------|-------|-----|-----|----|
| <p><b>23.¿Los respiradores elásticos son efectivos y seguros como elementos de protección personal en la atención de pacientes con COVID-19 dentro de las unidades de cuidados intensivos?</b></p> <p>No se puede emitir una recomendación a favor o en contra para el uso de respiradores elásticos como elementos de protección personal dentro de las unidades de cuidados intensivos. No hay evidencia que soporte la superioridad de los respiradores elásticos frente a los N95, son más costosos, difíciles de utilizar y pueden implicar algún riesgo para el paciente. Por tanto, su uso sólo debería considerarse frente a un desabastecimiento de los N95 y bajo la adopción de un protocolo institucional riguroso y bajo chequeo.</p> | 8 (6) | 74% | 18% | 8% |
| <p><b>24.¿Cuántas veces se recomienda la limpieza y desinfección de los equipos biomédicos y las superficies expuestas en los cubículos en UCI con pacientes sospechosos o confirmados con COVID-19?</b></p> <p>Se recomienda realizar la limpieza y desinfección de equipos biomédicos y de superficies las veces que sean necesarias y en el momento de egreso del paciente siguiendo los protocolos de cada institución. El desinfectante para este proceso debe ser de nivel intermedio o alto para superficies y equipos biomédicos y cumplir con las recomendaciones del fabricante según lo aprobado en el registro sanitario.</p> <p><b>Fuerte a favor</b></p>                                                                             | 9 (8) | 94% | 4%  | 2% |
| <p><b>25.¿Para la transferencia intra o interhospitalario del paciente con sospecha o diagnóstico de COVID-19 en estado crítico debe adoptarse un procedimiento estandarizado específico?</b></p> <p>Se recomienda que el ingreso de un paciente a UCI debe hacerse bajo un procedimiento estandarizado que incluya la coordinación y comunicación de los servicios vinculados, adecuación de la unidad de atención a las necesidades del paciente y la garantía de la bioseguridad del equipo multidisciplinario.</p> <p><b>Fuerte a favor</b></p> <p>Se recomienda que cada institución establezca en sus procesos prioritarios el circuito del traslado que incluye el itinerario del traslado, el uso de</p>                                   | 9 (9) | 98% | 2%  | 0% |

|                                                                                                                                                                                                                                                                                                                                                                                                                                                                                                                                                                                                                                                                                                                                                                                                                                                    |       |     |     |    |
|----------------------------------------------------------------------------------------------------------------------------------------------------------------------------------------------------------------------------------------------------------------------------------------------------------------------------------------------------------------------------------------------------------------------------------------------------------------------------------------------------------------------------------------------------------------------------------------------------------------------------------------------------------------------------------------------------------------------------------------------------------------------------------------------------------------------------------------------------|-------|-----|-----|----|
| <p>ascensor, el número y la organización de los intervinientes sanitarios y no sanitarios (celadores, seguridad, limpieza), las medidas de protección empleadas por los mismos (EPP, limpieza) y los recursos materiales necesarios durante el traslado.</p> <p><b>Fuerte a favor</b></p>                                                                                                                                                                                                                                                                                                                                                                                                                                                                                                                                                          |       |     |     |    |
| <b>II. Abordaje diagnóstico y COVID-19</b>                                                                                                                                                                                                                                                                                                                                                                                                                                                                                                                                                                                                                                                                                                                                                                                                         |       |     |     |    |
| <p><b>1.¿Cuál es el comportamiento clínico y estadios patológicos de la infección por SARS-CoV-2 / COVID-19 en pacientes críticos?</b></p> <p>Se recomienda en pacientes con diagnóstico o sospecha de infección por SARS-CoV-2 clasificar la enfermedad en leve, severo o paciente crítico, teniendo en cuenta los criterios de la clasificación por las fases y estadios de la enfermedad.</p> <p><b>Fuerte a favor</b></p> <p>Se recomienda en pacientes con diagnóstico o sospecha de infección por SARS-CoV-2, clasificados como críticos y que requieren de intubación orotraqueal realizar la clasificación por fenotipos (1 o 2), con el fin de proyectar una estrategia de ventilación mecánica.</p> <p><b>Fuerte a favor</b></p>                                                                                                         | 9 (7) | 84% | 12% | 4% |
| <p><b>2.¿Cuál es la mejor estrategia diagnóstica de acuerdo con la fase de enfermedad en pacientes críticos con sospecha o diagnóstico de COVID-19?</b></p> <p>Se recomienda en cuidado intensivo, realizar el diagnóstico de COVID-19 del paciente sospechoso por medio de RT-PCR conociendo su alta especificidad, su variabilidad en relación con el tiempo y pérdida de rendimiento diagnóstico luego de la primera semana de inicio de los síntomas.</p> <p><b>Fuerte a favor</b></p> <p>Se recomienda tomar la primera muestra para RT-PCR de hisopado nasofaríngeo o de cornete medio sobre hisopado orofaríngeo o de saliva, de ser negativo se puede repetir la prueba de 24 a 48 horas preferiblemente de tracto respiratorio inferior, esputo no inducido o en aspirado traqueal en paciente intubado.</p> <p><b>Fuerte a favor</b></p> | 9 (8) | 96% | 2%  | 2% |

|                                                                                                                                                                                                                                                                                                                                                                                                                                                                                                                                                                                                                                                                                                                                                                                      |       |     |     |    |
|--------------------------------------------------------------------------------------------------------------------------------------------------------------------------------------------------------------------------------------------------------------------------------------------------------------------------------------------------------------------------------------------------------------------------------------------------------------------------------------------------------------------------------------------------------------------------------------------------------------------------------------------------------------------------------------------------------------------------------------------------------------------------------------|-------|-----|-----|----|
| <p>Se recomienda el uso conjunto de RT-PCR e IgM por ELISA en pacientes con sospecha de COVID-19, primera RT-PCR negativa, que se encuentren entre la segunda y tercera semana desde el inicio de los síntomas, con el objetivo de mejorar la sensibilidad en la identificación de infección por SARS-CoV-2.</p> <p><b>Fuerte a favor</b></p>                                                                                                                                                                                                                                                                                                                                                                                                                                        |       |     |     |    |
| <p><b>3.¿En pacientes críticos con sospecha o diagnóstico de COVID-19 se deben medir marcadores de severidad al ingreso y durante la estancia en UCI para determinar el pronóstico del paciente?</b></p> <p>Se recomienda la medición de marcadores de severidad al ingreso a UCI del paciente críticamente enfermo por COVID-19 (hemograma, transaminasas, LDH, ferritina, troponina, dímero D y PCR) los cuales se han asociado con peor pronóstico en la enfermedad por COVID-19, logrando ofrecer intervenciones más tempranas.</p> <p><b>Fuerte a favor</b></p> <p>Se recomienda no utilizar una periodicidad de rutina para la medición de seguimiento de biomarcadores de severidad en el paciente con sospecha o diagnóstico de COVID-19.</p> <p><b>Fuerte en contra</b></p> | 9 (8) | 96% | 2%  | 2% |
| <p><b>4.¿Se debe medir marcadores de inflamación dentro de algoritmos terapéuticos para iniciar tratamiento específico en pacientes críticos con sospecha o diagnóstico de COVID-19?</b></p> <p>Se recomienda la no medición de marcadores de inflamación o de severidad de forma rutinaria solo con el objetivo de iniciar un tratamiento específico o algoritmos terapéuticos en la enfermedad por COVID-19 en pacientes críticos.</p> <p><b>Fuerte en contra</b></p>                                                                                                                                                                                                                                                                                                              | 9 (7) | 86% | 10% | 4% |
| <p><b>5.¿En pacientes críticos con sospecha o diagnóstico de COVID-19 en cuidados intensivos las imágenes radiológicas son útiles para establecer el diagnóstico y pronóstico?</b></p> <p>Se recomienda realizar radiografía simple de tórax para todos los pacientes con sospecha o diagnóstico de COVID-19 en UCI.</p> <p><b>Fuerte a favor</b></p>                                                                                                                                                                                                                                                                                                                                                                                                                                | 9 (8) | 92% | 4%  | 4% |

|                                                                                                                                                                                                                                                                                                                                                                                                                                                                                                                                                                                                                                                                                                                                                                                                                                                                                                                                                                                               |       |     |    |     |
|-----------------------------------------------------------------------------------------------------------------------------------------------------------------------------------------------------------------------------------------------------------------------------------------------------------------------------------------------------------------------------------------------------------------------------------------------------------------------------------------------------------------------------------------------------------------------------------------------------------------------------------------------------------------------------------------------------------------------------------------------------------------------------------------------------------------------------------------------------------------------------------------------------------------------------------------------------------------------------------------------|-------|-----|----|-----|
| <p>Se recomienda realizar TAC de tórax según disponibilidad de tecnología institucional, ante la incertidumbre diagnóstica, teniendo en cuenta las condiciones clínicas, la tolerancia del paciente al traslado y los protocolos administrativos de seguridad.</p> <p><b>Fuerte a favor</b></p>                                                                                                                                                                                                                                                                                                                                                                                                                                                                                                                                                                                                                                                                                               |       |     |    |     |
| <p><b>6.¿En pacientes críticos con sospecha o diagnóstico de COVID-19 debemos practicar ultrasonografía a la cabecera del paciente como herramienta diagnóstica y/o pronóstica en comparación con otras imágenes para disminuir el traslado hospitalario?</b></p> <p>No se puede emitir una recomendación a favor o en contra para el uso de ecografía pulmonar a la cabecera del paciente crítico como herramienta diagnóstica o de pronóstico en con COVID-19. Se puede considerar como una alternativa para la valoración imagenológica pulmonar en el paciente crítico con COVID-19 cuando las condiciones del paciente no permitan su traslado.</p> <p>No se sugiere la utilización de la ecografía pulmonar para el seguimiento de lesiones pulmonares agudas en el enfoque del paciente crítico con COVID-19. Puede utilizarse para determinar complicaciones asociadas a la enfermedad o en la inserción de dispositivos invasivos.</p> <p><b>Punto de buena práctica clínica</b></p> | 7 (5) | 72% | 8% | 20% |
| <p><b>7.¿En pacientes críticos con sospecha o diagnóstico de COVID-19 se puede utilizar un punto de corte para el valor de Dímero D que justifique anticoagulación terapéutica vs profiláctica para disminuir morbimortalidad?</b></p> <p>Se recomienda no establecer un punto de corte en el valor de Dímero D para el inicio rutinario de anticoagulación plena en el contexto de infección por COVID-19.</p> <p><b>Fuerte en contra</b></p> <p>Se recomienda la administración de profilaxis antitrombótica según protocolo institucional independiente de niveles de Dímero D en el paciente críticamente enfermo por COVID-19.</p> <p><b>Fuerte a favor</b></p>                                                                                                                                                                                                                                                                                                                          | 9 (7) | 88% | 8% | 4%  |



|                                                                                                                                                                                                                                                                                                                                                                                                                                                                                                                                                                                                                                                                                                                                                                                                                                                             |       |     |     |    |
|-------------------------------------------------------------------------------------------------------------------------------------------------------------------------------------------------------------------------------------------------------------------------------------------------------------------------------------------------------------------------------------------------------------------------------------------------------------------------------------------------------------------------------------------------------------------------------------------------------------------------------------------------------------------------------------------------------------------------------------------------------------------------------------------------------------------------------------------------------------|-------|-----|-----|----|
|                                                                                                                                                                                                                                                                                                                                                                                                                                                                                                                                                                                                                                                                                                                                                                                                                                                             |       |     |     |    |
| <p><b>8.¿En pacientes críticos con sospecha o diagnóstico de COVID-19 debemos utilizar procalcitonina en un algoritmo diagnóstico de sobreinfección bacteriana para iniciar tratamiento antibiótico?</b></p> <p>Se recomienda no utilizar de rutina la procalcitonina en un algoritmo diagnóstico, para diferenciar entre neumonía viral vs bacteriana o confirmar la presencia de una sobreinfección bacteriana en el paciente con sospecha o diagnóstico de COVID-19.</p> <p><b>Fuerte en contra</b></p> <p>Se recomienda no medir de forma rutinaria la procalcitonina en pacientes con sospecha o diagnóstico de COVID-19 como factor pronóstico.</p> <p><b>Fuerte en contra</b></p>                                                                                                                                                                    | 9 (7) | 84% | 12% | 4% |
| <p><b>9.¿Qué consideraciones clínicas o de laboratorio se deben tener en cuenta para determinar la resolución de la enfermedad en cuidado intensivo?</b></p> <p>Se recomienda no usar de forma rutinaria pruebas clínicas de laboratorio para determinar la resolución de la enfermedad crítica por COVID-19.</p> <p><b>Fuerte en contra</b></p> <p>Se recomienda considerar la ausencia de dificultad respiratoria y fiebre por más de 72 horas, requerimiento de oxígeno a baja concentración y bajo flujo, como indicadores clínicos de resolución de la fase crítica de la enfermedad por COVID-19.</p> <p><b>Fuerte a favor</b></p> <p>Se recomienda no utilizar de forma rutinaria pruebas microbiológicas de erradicación viral, para determinar la resolución de la enfermedad en pacientes en UCI con COVID-19.</p> <p><b>Fuerte en contra</b></p> | 9 (8) | 96% | 4%  | 0% |
| <b>III. Pulmón y COVID-19</b>                                                                                                                                                                                                                                                                                                                                                                                                                                                                                                                                                                                                                                                                                                                                                                                                                               |       |     |     |    |
| <p><b>1.¿Cuál es la utilidad de la cánula de alto flujo como medida de soporte provisional o definitivo en el paciente adulto con sospecha o diagnóstico de COVID-19 en insuficiencia respiratoria aguda?</b></p> <p>Se recomienda la cánula de alto flujo, donde esté disponible, en pacientes con COVID-19 a nivel del</p>                                                                                                                                                                                                                                                                                                                                                                                                                                                                                                                                | 9 (7) | 88% | 8%  | 4% |

|                                                                                                                                                                                                                                                                                                                                                                                                                                                                                                                                                                                                                                                                                                                                                                                                                                                                                                                                                                                                                                                                                                                                                                                                                                                                                                                                                                                                                                                                                                                                                                                                                                                               |       |     |     |    |
|---------------------------------------------------------------------------------------------------------------------------------------------------------------------------------------------------------------------------------------------------------------------------------------------------------------------------------------------------------------------------------------------------------------------------------------------------------------------------------------------------------------------------------------------------------------------------------------------------------------------------------------------------------------------------------------------------------------------------------------------------------------------------------------------------------------------------------------------------------------------------------------------------------------------------------------------------------------------------------------------------------------------------------------------------------------------------------------------------------------------------------------------------------------------------------------------------------------------------------------------------------------------------------------------------------------------------------------------------------------------------------------------------------------------------------------------------------------------------------------------------------------------------------------------------------------------------------------------------------------------------------------------------------------|-------|-----|-----|----|
| <p>mar con hipoxemia leve (<math>\text{PaO}_2/\text{FiO}_2 &lt; 300</math> y <math>&gt; 200</math> o <math>\text{SaO}_2/\text{FiO}_2 &lt; 300</math> y <math>&gt; 200</math>). En alturas superiores a los 2000 mts por encima del nivel del mar esta terapia se puede considerar en pacientes que no tengan hipoxemia severa (<math>\text{PAFI} &lt; 100</math>).</p> <p><b>Fuerte a favor</b></p> <p>Se recomienda en pacientes críticos por COVID-19 el uso de la cánula de alto flujo en salas de presión negativa, donde estén disponibles, que garanticen la seguridad del recurso humano. Si no se dispone de habitación con presión negativa se puede optar por habitación individual cerrada. Se debe contar con todo el equipo de protección personal necesario para el personal sanitario y de apoyo.</p> <p><b>Fuerte a favor</b></p> <p>Se recomienda colocar mascarilla quirúrgica por encima de la cánula nasal en el paciente con sospecha o diagnóstico de COVID-19 y mantener una distancia mínima de 2 metros con otros pacientes.</p> <p><b>Fuerte a favor</b></p> <p>Se recomienda la intubación inmediata en pacientes críticamente enfermos con sospecha o diagnóstico COVID-19 con índice de ROX (<math>[\text{SpO}_2/\text{FiO}_2] / \text{Frecuencia respiratoria}</math>) <math>&lt; 3</math> a las 2 horas de iniciada la oxigenación con cánula de alto flujo teniendo en cuenta que el retraso en la intubación aumenta la mortalidad.</p> <p><b>Fuerte a favor</b></p> <p>Se recomienda considerar la cánula de alto flujo en caso de agotamiento de ventiladores mecánicos.</p> <p><b>Punto de buena práctica clínica</b></p> |       |     |     |    |
| <p><b>2.¿Existen ventajas entre las distintas intervenciones farmacológicas para establecer los esquemas de sedación y analgesia en los pacientes con sospecha o diagnóstico de COVID-19 en ventilación mecánica?</b></p> <p>Se recomienda crear o ajustar protocolos institucionales de sedoanalgesia basado en objetivos con escalas validadas.</p> <p><b>Fuerte a favor</b></p> <p>Se recomienda el uso de analgesia multimodal que incluya analgésicos opioides, no opioides y</p>                                                                                                                                                                                                                                                                                                                                                                                                                                                                                                                                                                                                                                                                                                                                                                                                                                                                                                                                                                                                                                                                                                                                                                        | 8 (7) | 82% | 12% | 6% |

|                                                                                                                                                                                                                                                                                                                                                                                                                                                                                                                                                                                                                                                                                                                                                                                                                                                                                                                                                                                                                                                                                                                                                                                                                                                                                               |       |     |     |    |
|-----------------------------------------------------------------------------------------------------------------------------------------------------------------------------------------------------------------------------------------------------------------------------------------------------------------------------------------------------------------------------------------------------------------------------------------------------------------------------------------------------------------------------------------------------------------------------------------------------------------------------------------------------------------------------------------------------------------------------------------------------------------------------------------------------------------------------------------------------------------------------------------------------------------------------------------------------------------------------------------------------------------------------------------------------------------------------------------------------------------------------------------------------------------------------------------------------------------------------------------------------------------------------------------------|-------|-----|-----|----|
| <p>bloqueos regionales en el paciente crítico por sospecha o diagnóstico de COVID-19.</p> <p><b>Fuerte a favor</b></p> <p>Se recomienda sedación profunda con agentes como Midazolam o Propofol para mantener RASS entre -4 y -5 en pacientes COVID-19 con SDRA severo, necesidad de uso de relajantes neuromusculares o posición prona.</p> <p><b>Fuerte a favor</b></p> <p>Se puede considerar en planos de sedación superficial agentes como propofol o dexmedetomidina (coadyuvante) para mantener RASS entre 0 y -3 en pacientes seleccionados con sospecha o diagnóstico de COVID-19 con SDRA no severo.</p> <p><b>Punto de buena práctica clínica</b></p>                                                                                                                                                                                                                                                                                                                                                                                                                                                                                                                                                                                                                              |       |     |     |    |
| <p><b>3.¿En pacientes con sospecha o diagnóstico de COVID-19 y SDRA que requieren ventilación mecánica invasiva existe alguna estrategia ventilatoria superior a otra en términos de efectividad y seguridad?</b></p> <p>Se recomienda iniciar una estrategia individualizada de ventilación mecánica ajustadas a las condiciones específicas de severidad en el paciente crítico con COVID-19.</p> <p><b>Fuerte a favor</b></p> <p>Se recomienda la ventilación protectora en modos controlados por volumen o por presión que garanticen un volumen corriente &lt; 8 cc/kg de peso predicho, teniendo como metas una presión meseta &lt; 30 cm H<sub>2</sub>O y una presión de conducción &lt; 15 cm H<sub>2</sub>O.</p> <p><b>Fuerte a favor</b></p> <p>Se recomienda emplear fracciones inspiradas de oxígeno para lograr metas de saturación de acuerdo con la PaO<sub>2</sub>/FiO<sub>2</sub> entre 88 y 92% en el paciente con sospecha o diagnóstico de COVID-19. En la paciente embarazada entre 92 y 95%.</p> <p><b>Fuerte a favor</b></p> <p>Se recomienda en el paciente crítico por COVID-19 iniciar con PEEP individualizado a la severidad del compromiso pulmonar y ajustar el nivel de PEEP de acuerdo con la tabla de FiO<sub>2</sub>/PEEP.</p> <p><b>Fuerte a favor</b></p> | 9 (8) | 90% | 10% | 0% |

|                                                                                                                                                                                                                                                                                                                                                                                                                                                                                                                                                                                                                                                                                                                                                                                                                                                                                                                                                                                                                           |       |     |     |    |
|---------------------------------------------------------------------------------------------------------------------------------------------------------------------------------------------------------------------------------------------------------------------------------------------------------------------------------------------------------------------------------------------------------------------------------------------------------------------------------------------------------------------------------------------------------------------------------------------------------------------------------------------------------------------------------------------------------------------------------------------------------------------------------------------------------------------------------------------------------------------------------------------------------------------------------------------------------------------------------------------------------------------------|-------|-----|-----|----|
| <p><b>4.¿En pacientes adultos con sospecha o diagnóstico de COVID-19 la aplicación fisiopatológica de los fenotipos clínicos y de mecánica respiratoria pueden influir en la toma de decisiones en ventilación mecánica y sus desenlaces?</b></p> <p>Se recomienda la ventilación mecánica protectora en SDRA por COVID-19 independiente del fenotipo de presentación.<br/><b>Fuerte a favor</b></p> <p>Se recomienda la clasificación de fenotipos en SDRA para pacientes con COVID-19 para ajustar la toma de decisiones de manera individualizada en ventilación mecánica.<br/><b>Fuerte a favor</b></p>                                                                                                                                                                                                                                                                                                                                                                                                               | 9 (8) | 86% | 12% | 2% |
| <p><b>5.¿Cómo se define hipoxemia refractaria en pacientes adultos con sospecha o diagnóstico de COVID-19 y que medidas terapéuticas no ventilatorias pueden implementarse?</b></p> <p>Se recomienda en paciente con COVID-19 considerar hipoxemia refractaria cuando no se obtienen las metas de oxígeno propuestas, a pesar de las maniobras ventilatorias recomendadas y cumple con los siguientes parámetros: PAFI &lt; 150, FiO2 &gt; 0,6 y PEEP apropiado, considerando la altitud.<br/><b>Fuerte a favor</b></p> <p>Se recomienda considerar la utilización de ECMO, en sitios donde esté disponible y con alta experiencia para obtener resultados aceptables, en pacientes con hipoxemia refractaria luego de haber implementado ventilación protectora, relajación neuromuscular y posición prona.<br/><b>Fuerte a favor</b></p> <p>Se recomienda administrar tromboprofilaxis en todos los pacientes con COVID-19 con hipoxemia refractaria que no presenten contraindicaciones.<br/><b>Fuerte a favor</b></p> | 9 (7) | 88% | 8%  | 4% |
| <p><b>6.¿En pacientes adultos con SDRA y sospecha o diagnóstico de COVID-19 en ventilación mecánica invasiva que variables deben ser parte del monitoreo ventilatorio sistemático?</b></p> <p>Se recomienda monitorizar sistemáticamente la oxigenación con los índices: PaO2/FiO2 y</p>                                                                                                                                                                                                                                                                                                                                                                                                                                                                                                                                                                                                                                                                                                                                  | 9 (7) | 96% | 2%  | 2% |

|                                                                                                                                                                                                                                                                                                                                                                                                                                                                                                                                                                                                                                                                                                                                                                                                                                                                                                                                                                                                                                                                                                                                                      |       |     |     |    |
|------------------------------------------------------------------------------------------------------------------------------------------------------------------------------------------------------------------------------------------------------------------------------------------------------------------------------------------------------------------------------------------------------------------------------------------------------------------------------------------------------------------------------------------------------------------------------------------------------------------------------------------------------------------------------------------------------------------------------------------------------------------------------------------------------------------------------------------------------------------------------------------------------------------------------------------------------------------------------------------------------------------------------------------------------------------------------------------------------------------------------------------------------|-------|-----|-----|----|
| <p>SaO<sub>2</sub>/FiO<sub>2</sub>, y en donde esté disponible el monitoreo continuo con capnografía.</p> <p><b>Fuerte a favor</b></p> <p>Se recomienda monitorizar de forma rutinaria la presión meseta y la presión de conducción como estrategia al pie de la cama para verificar la ventilación protectora.</p> <p><b>Fuerte a favor</b></p>                                                                                                                                                                                                                                                                                                                                                                                                                                                                                                                                                                                                                                                                                                                                                                                                     |       |     |     |    |
| <p><b>7.¿El uso rutinario de relajación neuromuscular temprana en el paciente con sospecha o diagnóstico de COVID-19 con SDRA se asocia a mejores desenlaces frente a la relajación neuromuscular indicada en pacientes en posición prono o supino con pérdida de las metas de protección pulmonar?</b></p> <p>Se recomienda no utilizar de forma rutinaria la relajación neuromuscular en el paciente crítico con COVID-19 con SDRA.</p> <p><b>Fuerte en contra</b></p> <p>Se recomienda utilizar la relajación neuromuscular en pacientes en posición supino o prono, que están fuera de parámetros de protección pulmonar (presión de conducción mayor 15 y presión meseta mayor a 30) con PaFi menor 150 y cuando ya no es posible limitar el volumen corriente.</p> <p><b>Fuerte a favor</b></p> <p>Se debe considerar la utilización de protocolos estandarizados con el fin de disminuir la variabilidad, y según disponibilidad seleccionar el cisatracurio como primera opción, en caso de escasez se pueden utilizar otras opciones teniendo en cuenta su farmacodinamia y farmacéutica.</p> <p><b>Punto de buena práctica clínica</b></p> | 9 (8) | 84% | 10% | 6% |
| <p><b>8.¿Cuál es la efectividad y seguridad del óxido nítrico inhalado (Oni) en pacientes adultos con sospecha o diagnóstico de COVID-19 en SDRA?</b></p> <p>Se recomienda no utilizar de forma rutinaria ONi en pacientes adultos que presenten SDRA e infección por SARS-CoV-2.</p> <p><b>Fuerte en contra</b></p>                                                                                                                                                                                                                                                                                                                                                                                                                                                                                                                                                                                                                                                                                                                                                                                                                                 | 9 (8) | 84% | 12% | 4% |

|                                                                                                                                                                                                                                                                                                                                                                                                                                                                                                                                                                                                                                                                                                                                                                                                                                                                                                                                                                                                                                                                                                         |       |     |    |    |
|---------------------------------------------------------------------------------------------------------------------------------------------------------------------------------------------------------------------------------------------------------------------------------------------------------------------------------------------------------------------------------------------------------------------------------------------------------------------------------------------------------------------------------------------------------------------------------------------------------------------------------------------------------------------------------------------------------------------------------------------------------------------------------------------------------------------------------------------------------------------------------------------------------------------------------------------------------------------------------------------------------------------------------------------------------------------------------------------------------|-------|-----|----|----|
| <p><b>9.¿Cuál es la efectividad, seguridad y el tiempo recomendado de la ventilación mecánica en posición prono en pacientes adultos con sospecha o diagnóstico de COVID-19 con hipoxemia refractaria?</b></p> <p>Se recomienda el uso temprano de la ventilación en posición prona, por al menos 16 horas continuas, en pacientes con SDRA por COVID-19 con PaO<sub>2</sub>/FiO<sub>2</sub>&lt;150 mmHg.</p> <p><b>Fuerte a favor</b></p>                                                                                                                                                                                                                                                                                                                                                                                                                                                                                                                                                                                                                                                              | 9 (8) | 94% | 4% | 2% |
| <p><b>10.¿Cuáles estrategias se pueden implementar para el retiro de la ventilación mecánica en pacientes adultos con sospecha o diagnóstico de COVID-19 que desarrollaron SDRA?</b></p> <p>Se recomienda implementar un protocolo de retiro de ventilación mecánica basado en la prueba de respiración espontánea y articulado con un protocolo de sedación y analgesia en el paciente críticamente enfermo por sospecha o diagnóstico de COVID-19.</p> <p><b>Fuerte a favor</b></p>                                                                                                                                                                                                                                                                                                                                                                                                                                                                                                                                                                                                                   | 9 (8) | 94% | 4% | 2% |
| <p><b>11.¿Cuál es la utilidad de la ventilación mecánica no invasiva (VMNI) como medida de soporte provisional o definitiva en el paciente adulto con sospecha o diagnóstico de COVID-19 en insuficiencia respiratoria aguda?</b></p> <p>Se recomienda no utilizar VMNI como una intervención de rutina en el paciente con sospecha o diagnóstico de COVID-19.</p> <p><b>Fuerte en contra</b></p> <p>Se recomienda en el paciente con sospecha o diagnóstico de COVID-19 a quien se considera realizar VMNI, utilizarla en salas de presión negativa, donde estén disponibles, que garanticen la seguridad del recurso humano, con todo el equipo de protección personal necesario.</p> <p><b>Fuerte a favor</b></p> <p>Se recomienda considerar la VMNI en pacientes con COVID-19 con hipoxemia leve (PaO<sub>2</sub>/FiO<sub>2</sub>&lt;300 y &gt;200 o SaO<sub>2</sub>/FiO<sub>2</sub>&lt;300 y&gt;200) en salas de presión negativa, donde estén disponibles, que garanticen la seguridad del recurso humano, con todo el equipo de protección personal necesario.</p> <p><b>Fuerte a favor</b></p> | 9 (8) | 88% | 4% | 8% |

|                                                                                                                                                                                                                                                                                                                                                                                                                                                                                                                                                                                                                                                                                                                                                                                                                                                                                                                                                                                                                                                                                                                                                                                                                                |       |     |     |    |
|--------------------------------------------------------------------------------------------------------------------------------------------------------------------------------------------------------------------------------------------------------------------------------------------------------------------------------------------------------------------------------------------------------------------------------------------------------------------------------------------------------------------------------------------------------------------------------------------------------------------------------------------------------------------------------------------------------------------------------------------------------------------------------------------------------------------------------------------------------------------------------------------------------------------------------------------------------------------------------------------------------------------------------------------------------------------------------------------------------------------------------------------------------------------------------------------------------------------------------|-------|-----|-----|----|
| <p>Se recomienda considerar la VMNI en pacientes con COVID-19 con hipoxemia leve (<math>\text{PaO}_2/\text{FiO}_2 &lt; 300</math> y <math>&gt; 200</math> o <math>\text{SaO}_2/\text{FiO}_2 &lt; 300</math> y <math>&gt; 200</math>) y con historia de EPOC o cuadro de edema pulmonar agudo asociado en salas de presión negativa, donde estén disponibles, que garanticen la seguridad del recurso humano, con todo el equipo de protección personal necesario.</p> <p><b>Fuerte a favor</b></p> <p>Se recomienda colocar doble filtro en el circuito del ventilador para reducir el riesgo de generación de aerosoles en VMNI del paciente crítico con sospecha o diagnóstico de COVID-19.</p> <p><b>Fuerte a favor</b></p> <p>Se recomienda la intubación inmediata en pacientes críticamente enfermos por COVID-19 si se evidencia respiración toracoabdominal, uso de músculos accesorios, frecuencia respiratoria <math>&gt; 30</math>, hipoxemia (<math>\text{PaO}_2/\text{FiO}_2 &lt; 200</math> o <math>\text{SaO}_2/\text{FiO}_2 &lt; 200</math>), fracaso ventilatorio (<math>\text{pH} &lt; 7.35</math> con <math>\text{PaCO}_2 &gt; 45</math> mmHg), HACOR <math>&gt; 5</math>.</p> <p><b>Fuerte a favor</b></p> |       |     |     |    |
| <p><b>12. ¿Cuál es la efectividad y seguridad de la posición prono en pacientes adultos con sospecha o diagnóstico de COVID-19 en respiración espontánea?</b></p> <p>Se sugiere el uso de posición prono en pacientes no ventilados críticamente enfermo por COVID-19 que no responden a la oxigenoterapia convencional de acuerdo con los protocolos institucionales, las condiciones de cada servicio y la tolerancia individual de cada paciente.</p> <p><b>Débil a favor</b></p>                                                                                                                                                                                                                                                                                                                                                                                                                                                                                                                                                                                                                                                                                                                                           | 8 (7) | 79% | 16% | 5% |
| <b>IV. Corazón y COVID-19</b>                                                                                                                                                                                                                                                                                                                                                                                                                                                                                                                                                                                                                                                                                                                                                                                                                                                                                                                                                                                                                                                                                                                                                                                                  |       |     |     |    |
| <p><b>1. ¿La elevación de biomarcadores de lesión miocárdica como la troponina y el NT-Pro-BNP en pacientes críticos adultos con COVID-19 puede suprimir la necesidad de ecocardiografía transtorácica para el estudio de la sospecha clínica de disfunción miocárdica?</b></p> <p>Se recomienda considerar la elevación de biomarcadores como la troponina I o T y el NT-Pro-BNP en el paciente con COVID-19 como indicadores de injuria miocárdica aguda, sin</p>                                                                                                                                                                                                                                                                                                                                                                                                                                                                                                                                                                                                                                                                                                                                                            | 9 (8) | 92% | 4%  | 4% |

|                                                                                                                                                                                                                                                                                                                                                                                                                                                                                                                                                                                                                                                                                                                                                                                                                                                                                                                                                                                                                          |       |     |     |    |
|--------------------------------------------------------------------------------------------------------------------------------------------------------------------------------------------------------------------------------------------------------------------------------------------------------------------------------------------------------------------------------------------------------------------------------------------------------------------------------------------------------------------------------------------------------------------------------------------------------------------------------------------------------------------------------------------------------------------------------------------------------------------------------------------------------------------------------------------------------------------------------------------------------------------------------------------------------------------------------------------------------------------------|-------|-----|-----|----|
| <p>embargo, no reemplazan la ecocardiografía en el enfoque del paciente con sospecha de disfunción miocárdica.</p> <p><b>Fuerte a favor</b></p>                                                                                                                                                                                                                                                                                                                                                                                                                                                                                                                                                                                                                                                                                                                                                                                                                                                                          |       |     |     |    |
| <p><b>2.¿En pacientes críticos adultos con sospecha o diagnóstico de COVID-19 y disfunción miocárdica cuales son los marcadores que se relacionan con mal pronóstico?</b></p> <p>Se recomienda considerar como marcadores iniciales de mal pronóstico en el paciente crítico con COVID-19 con sospecha de disfunción miocárdica aguda la elevación persistente de Troponina I, Mioglobina o Creatin Kinasa; independiente de la fracción de eyección del ventrículo izquierdo evaluada mediante ecocardiografía.</p> <p><b>Fuerte a favor</b></p>                                                                                                                                                                                                                                                                                                                                                                                                                                                                        | 9 (8) | 94% | 4%  | 2% |
| <p><b>3.¿Cuáles son las indicaciones de ecocardiografía en el paciente crítico con sospecha o diagnóstico de COVID-19 durante la estancia en UCI?</b></p> <p>Se recomienda no realizar de forma rutinaria ecocardiografía en pacientes críticos con COVID-19.</p> <p><b>Fuerte en contra</b></p> <p>Se debe practicar ecocardiografía en pacientes con sospecha o diagnóstico de COVID-19 si presenta alguna de las siguientes condiciones:</p> <ol style="list-style-type: none"> <li>1. Síntomas y signos de insuficiencia cardíaca aguda de Novo.</li> <li>2. Shock o deterioro súbito hemodinámico refractario a líquidos y/o vasoactivos con sospecha de origen cardiogénico.</li> <li>3. Sospecha de infarto agudo de miocardio o embolismo pulmonar para determinar intervenciones terapéuticas con un beneficio clínico.</li> <li>4. Cambios en el electrocardiograma, arritmias ventriculares o paro cardiorrespiratorio no explicados por otra causa.</li> </ol> <p><b>Punto de buena práctica clínica</b></p> | 9 (8) | 96% | 4%  | 0% |
| <p><b>4.¿En pacientes con sospecha o diagnóstico de COVID-19 en cuidados intensivos con shock o Síndrome de disfunción orgánica múltiple (SDOM) el monitoreo invasivo con catéter de arteria pulmonar (CAP) o</b></p>                                                                                                                                                                                                                                                                                                                                                                                                                                                                                                                                                                                                                                                                                                                                                                                                    | 8 (7) | 79% | 17% | 4% |



|                                                                                                                                                                                                                                                                                                                                                                                                                                                                                                                                                                                                                                                                                                                                                                                                                                                                                                                 |       |     |     |    |
|-----------------------------------------------------------------------------------------------------------------------------------------------------------------------------------------------------------------------------------------------------------------------------------------------------------------------------------------------------------------------------------------------------------------------------------------------------------------------------------------------------------------------------------------------------------------------------------------------------------------------------------------------------------------------------------------------------------------------------------------------------------------------------------------------------------------------------------------------------------------------------------------------------------------|-------|-----|-----|----|
| <p><b>termodilución transpulmonar (TdTP) puede cambiar el desenlace clínico y/o las intervenciones terapéuticas frente al monitoreo menos invasivo?</b></p> <p>Se sugiere en pacientes críticamente enfermos con COVID-19 que cursan con shock y SDOM, ajustar la monitoria a las condiciones clínicas del paciente y recursos disponibles. Se puede considerar el CAP para el monitoreo del gasto cardiaco, la valoración de la perfusión y orientar los elementos hemodinámicos del tipo de shock, el CAP de gasto cardiaco continuo puede disminuir la exposición del personal de salud frente al catéter de medición convencional.</p> <p><b>Débil a favor</b></p> <p>Se sugiere la utilización de la TdTP dependiendo de la disponibilidad del recurso para orientar el diagnóstico diferencial del SDRA versus edema pulmonar cardiogénico en los pacientes con COVID-19.</p> <p><b>Débil a favor</b></p> |       |     |     |    |
| <p><b>5.¿Es útil la implementación de un protocolo de ultrasonido torácico dirigido a la cabecera (POCUS) del paciente con sospecha o diagnóstico de COVID-19 como alternativa al monitoreo hemodinámico invasivo o mínimamente invasivo para dirigir las intervenciones terapéuticas?</b></p> <p>No se puede emitir una recomendación a favor o en contra para la utilización de un protocolo de ultrasonido rutinario a la cabecera del paciente (POCUS). Sin embargo, se podría considerar el uso en pacientes seleccionados, con los adecuados EPP y desinfección de los equipos; donde el POCUS pueda tener ventajas sobre otras modalidades de monitoria o en pacientes con limitaciones para monitoria invasiva que requieren evaluación del estado hemodinámico o determinación de severidad del compromiso pulmonar.</p>                                                                               | 8 (6) | 74% | 20% | 6% |
| <p><b>6.¿Cuáles metas de reanimación tisular se deben perseguir para favorecer el desenlace clínico en el paciente con sospecha o diagnóstico de COVID-19 en estado de shock?</b></p> <p>Se recomienda perseguir al inicio de la reanimación del paciente críticamente enfermo con COVID-19, metas clínicas de fácil medición,</p>                                                                                                                                                                                                                                                                                                                                                                                                                                                                                                                                                                              | 9 (8) | 94% | 4%  | 2% |

|                                                                                                                                                                                                                                                                                                                                                                                                                                                                                                                                                                                                                                                                                                                                                                                                                                                                                                       |       |     |    |    |
|-------------------------------------------------------------------------------------------------------------------------------------------------------------------------------------------------------------------------------------------------------------------------------------------------------------------------------------------------------------------------------------------------------------------------------------------------------------------------------------------------------------------------------------------------------------------------------------------------------------------------------------------------------------------------------------------------------------------------------------------------------------------------------------------------------------------------------------------------------------------------------------------------------|-------|-----|----|----|
| <p>como la presión arterial media (entre 60 y 65 mmhg) o el gasto urinario (mayor a 0,5 cc/k/h) y metas de perfusión como el lactato en sangre arterial (menor a 2 mmol), la Saturación venosa central de oxígeno (entre 65 y 70%) y la diferencia Ven arterial de Co2 (menor a 6 mmhg).</p> <p><b>Fuerte a favor</b></p>                                                                                                                                                                                                                                                                                                                                                                                                                                                                                                                                                                             |       |     |    |    |
| <p><b>7.¿En pacientes adultos con sospecha o diagnóstico de COVID-19 en fase de reanimación tisular la fluidoterapia debe ser implementada mediante signos clínicos, variables estáticas de precarga o variables dinámicas?</b></p> <p>Se recomienda en la reanimación inicial de pacientes en estado de shock con sospecha o diagnóstico de COVID-19, guiar la fluidoterapia con el uso de índices clínicos como el tiempo de llenado capilar, temperatura de la piel y depuración de lactato; en fases avanzadas donde el monitoreo clínico es insuficiente utilizar medidas dinámicas como la variabilidad de presión de pulso (VPP), la variabilidad de volumen sistólico (VVS), la respuesta a la maniobra de elevación pasiva de piernas o la prueba de oclusión teleespiratoria de acuerdo a los recursos disponibles y la experiencia.</p> <p><b>Fuerte a favor</b></p>                       | 9 (8) | 94% | 6% | 0% |
| <p><b>8.¿En pacientes adultos con sospecha o diagnóstico de COVID-19 en fase de reanimación tisular existen beneficios en desenlaces clínicos asociados a las distintas intervenciones farmacológicas para soporte cardiovascular (inotrópicos o vasopresores)?</b></p> <p>Se recomienda en pacientes adultos con COVID-19 y estado de shock, escoger la norepinefrina como el vasopresor de primera línea y a la vasopresina el de segunda. Si no se cuenta con norepinefrina el uso de vasopresina o epinefrina serían la primera elección; la dopamina no se recomienda por el mayor riesgo de arritmias.</p> <p><b>Fuerte a favor</b></p> <p>Se recomienda iniciar dobutamina frente al aumento de la dosis de Norepinefrina en pacientes en estado de shock con evidencia de disfunción cardíaca e hipoperfusión persistente a pesar de la reanimación inicial.</p> <p><b>Fuerte a favor</b></p> | 9 (8) | 94% | 4% | 2% |

|                                                                                                                                                                                                                                                                                                                                                                                                                                                                                                                                                                                                                                                                                                                                                                                                                                                                                                                                                                                                                                                                                                                                                                                                                                                                                               |       |     |    |    |
|-----------------------------------------------------------------------------------------------------------------------------------------------------------------------------------------------------------------------------------------------------------------------------------------------------------------------------------------------------------------------------------------------------------------------------------------------------------------------------------------------------------------------------------------------------------------------------------------------------------------------------------------------------------------------------------------------------------------------------------------------------------------------------------------------------------------------------------------------------------------------------------------------------------------------------------------------------------------------------------------------------------------------------------------------------------------------------------------------------------------------------------------------------------------------------------------------------------------------------------------------------------------------------------------------|-------|-----|----|----|
| <p><b>9.¿En pacientes con falla cardíaca crónica con sospecha o diagnóstico de COVID-19, es seguro continuar la medicación estándar titulada para falla cardíaca (IECAS, ARA-II, antiplaquetario, B-bloqueador, estatinas, ¿insulina) durante la atención en UCI?</b></p> <p>Se recomienda no suspender la medicación estándar para falla cardíaca en pacientes con sospecha o diagnóstico de COVID-19, especialmente los IECAS, ARA-II, y B-bloqueadores, si la condición clínica permite continuar el uso de esta medicación, ya que no se ha podido confirmar una asociación nociva.</p> <p><b>Fuerte en contra</b></p>                                                                                                                                                                                                                                                                                                                                                                                                                                                                                                                                                                                                                                                                    | 9 (8) | 96% | 4% | 0% |
| <p><b>10.¿En las áreas destinadas para el manejo del paciente con sospecha o diagnóstico de COVID-19 qué planificación organizacional y clínica puede implementarse para mejorar los desenlaces en el paciente que desarrolla paro cardíaco?</b></p> <p>Se recomienda establecer un protocolo de reanimación ajustado al contexto del paciente con COVID-19 con una organización administrativa ajustada a la pandemia que incluya las siguientes estrategias:</p> <ul style="list-style-type: none"> <li>• Desarrollar una estrategia de prevención del paro cardiorrespiratorio en el paciente con sospecha o diagnóstico de COVID-19 basada en la detección oportuna.</li> <li>• Formar un equipo multidisciplinar formado en RCP con líderes médicos, de enfermería y en terapia respiratoria, los cuales deben educar a todo el equipo de trabajo en la identificación de signos de alerta temprana, cambios abruptos de variables clínicas, técnicas de monitoreo, interpretación de paraclínicos y de alarmas de monitoreo.</li> <li>• Entrenamiento del personal sanitario a través del uso de la simulación clínica en manejo de crisis, EPP, y procesos de atención fundamentales en la atención del paro cardíaco en el paciente con sospecha o diagnóstico de COVID-19</li> </ul> | 9 (9) | 96% | 4% | 0% |

|                                                                                                                                                                                                                                                                                                                                                                                                                                                                                                                                                                                                                                                                                                                                                                                                                                                                                                                                                                                                                                                                                                                                                                                                                                                                                                                                                                                                                                                                                                                                                                                     |       |     |    |    |
|-------------------------------------------------------------------------------------------------------------------------------------------------------------------------------------------------------------------------------------------------------------------------------------------------------------------------------------------------------------------------------------------------------------------------------------------------------------------------------------------------------------------------------------------------------------------------------------------------------------------------------------------------------------------------------------------------------------------------------------------------------------------------------------------------------------------------------------------------------------------------------------------------------------------------------------------------------------------------------------------------------------------------------------------------------------------------------------------------------------------------------------------------------------------------------------------------------------------------------------------------------------------------------------------------------------------------------------------------------------------------------------------------------------------------------------------------------------------------------------------------------------------------------------------------------------------------------------|-------|-----|----|----|
| <ul style="list-style-type: none"> <li>Promover la comunicación asertiva, planeación y retroalimentación de las intervenciones realizadas antes y después de un evento de paro cardíaco (briefing y debriefing), con el fin de establecer modificaciones que conllevarán a mejoras en la atención de futuros eventos.</li> </ul> <p><b>Fuerte a favor</b></p>                                                                                                                                                                                                                                                                                                                                                                                                                                                                                                                                                                                                                                                                                                                                                                                                                                                                                                                                                                                                                                                                                                                                                                                                                       |       |     |    |    |
| <p><b>11. ¿Se deben implementar modificaciones en los protocolos de reanimación cardio cerebro pulmonar para la atención del paciente crítico con sospecha o diagnóstico de COVID-19 que desarrolla paro cardíaco en situaciones clínicas como ventilación espontánea, ventilación mecánica y ventilación prono para garantizar efectividad y también seguridad en el grupo de atención?</b></p> <p>Se recomienda establecer un protocolo de reanimación ajustado al contexto clínico del paciente con COVID-19 que incluya las siguientes modificaciones:</p> <ul style="list-style-type: none"> <li>Implementar criterios de selección e inicio de maniobras de RCP en la atención del paro cardíaco basados en la bioética y en el pronóstico de supervivencia a corto y largo plazo de los pacientes.</li> <li>Promover la prevención del paro cardíaco mediante la detección oportuna del riesgo y definir intubaciones programadas.</li> <li>Asegurar la correcta protección con los EPP necesarios al abordar el paro cardíaco y la intubación que son procedimientos generadores de aerosoles.</li> <li>Priorizar el manejo de la vía aérea antes del inicio de las compresiones torácicas, haciendo énfasis en la reducción de la exposición de aerosoles (código azul Protegido).</li> <li>Utilizar filtro de alta eficiencia contra virus para todas las estrategias de ventilación (bolsa mascarilla con cierre hermético y en el circuito del ventilador).</li> <li>Promover la realización de la intubación por el operador de mayor experticia con uso de</li> </ul> | 9 (8) | 94% | 6% | 0% |

|                                                                                                                                                                                                                                                                                                                                                                                                                                                                                                                                                                                                                                                                                                                                               |       |     |    |    |
|-----------------------------------------------------------------------------------------------------------------------------------------------------------------------------------------------------------------------------------------------------------------------------------------------------------------------------------------------------------------------------------------------------------------------------------------------------------------------------------------------------------------------------------------------------------------------------------------------------------------------------------------------------------------------------------------------------------------------------------------------|-------|-----|----|----|
| <p>videolaringoscopio si está disponible y considerar el acceso supraglótico solo si el intento de intubación es fallido.</p> <ul style="list-style-type: none"> <li>En caso de parada cardiaca en ventilación mecánica iniciar el masaje cardiaco evitando las desconexiones del circuito del respirador.</li> <li>En caso de paro en posición prono si el paciente se encuentra vigil retornar rápidamente a la posición supino y si está en ventilación mecánica es razonable realizar compresiones en la espalda.</li> </ul> <p><b>Fuerte a favor</b></p>                                                                                                                                                                                 |       |     |    |    |
| <b>V. Cerebro y COVID-19</b>                                                                                                                                                                                                                                                                                                                                                                                                                                                                                                                                                                                                                                                                                                                  |       |     |    |    |
| <p><b>1.¿Se puede establecer un espectro de manifestaciones neurológicas específicas en el paciente con sospecha o diagnóstico de COVID-19?</b></p> <p>Se recomienda no considerar la existencia de manifestaciones neurológicas específicas o típicas atribuidas a la Infección por SARS-CoV2.</p> <p><b>Fuerte en contra</b></p> <p>Se recomienda realizar la valoración neurológica integral del paciente con diagnóstico o sospecha de SARS-CoV2 teniendo en cuenta manifestaciones frecuentes relacionadas a COVID-19: disgeusia, anosmia, cefalea, vértigo, confusión, delirium, alteración de estado de consciencia, eventos cerebrovasculares, ataxia, polineuropatías inflamatorias y convulsiones.</p> <p><b>Fuerte a favor</b></p> | 9 (8) | 94% | 4% | 2% |
| <p><b>2.¿Cuáles son los predictores y/o factores clínicos asociados a los desórdenes neurológicos en el paciente con sospecha o diagnóstico de COVID-19?</b></p> <p>Se recomienda considerar como predictores clínicos neurológicos de alerta para sospechar COVID-19: anosmia, disgeusia, delirium y alteraciones neuromusculares inespecíficas sin otra causa aparente de explicación.</p> <p><b>Fuerte a favor</b></p> <p>Se recomienda no establecer de rutina predictores neurológicos específicos de mal pronóstico en el paciente críticamente enfermo con COVID-19.</p> <p><b>Fuerte en contra</b></p>                                                                                                                                | 9 (8) | 94% | 6% | 0% |

|                                                                                                                                                                                                                                                                                                                                                                                                                                                                                                                                                                                                                                                                                                                                                                                                                                                                                                                                                                                                                                                                                          |       |     |    |    |
|------------------------------------------------------------------------------------------------------------------------------------------------------------------------------------------------------------------------------------------------------------------------------------------------------------------------------------------------------------------------------------------------------------------------------------------------------------------------------------------------------------------------------------------------------------------------------------------------------------------------------------------------------------------------------------------------------------------------------------------------------------------------------------------------------------------------------------------------------------------------------------------------------------------------------------------------------------------------------------------------------------------------------------------------------------------------------------------|-------|-----|----|----|
| <p>Se deben tener en cuenta los factores de riesgo generales de mal pronóstico para la población general como la edad avanzada, las comorbilidades cardiovasculares y el tabaquismo.</p> <p><b>Punto de buena práctica clínica</b></p>                                                                                                                                                                                                                                                                                                                                                                                                                                                                                                                                                                                                                                                                                                                                                                                                                                                   |       |     |    |    |
| <p><b>3.¿Es todo paciente con ACV isquémico agudo en tiempo de pandemia debe considerarse como sospechoso de COVID-19 y así determinar medidas de protección personal para el personal médico o cambios en los protocolos de manejo de ACV?</b></p> <p>Se recomienda que todo paciente con ACV isquémico se considere sospechoso de infección por COVID-19 si presenta: sintomatología asociada sospechosa de infección por COVID-19, contacto cercano con individuos con sintomatología infecciosa, allegados con viajes recientes, si la historia clínica es atípica, si la información suministrada no es clara, si presenta deterioro del estado de alerta inexplicable, y si al examen físico presenta hallazgos compatibles con una infección por COVID-19.</p> <p><b>Fuerte a favor</b></p> <p>Se recomienda que todo paciente con ACV isquémico de quien no se pueda recibir información se considere sospechoso de COVID-19 ya que el evento cerebro vascular es una complicación que se ha reportado en pacientes con infección por COVID-19.</p> <p><b>Fuerte a favor</b></p> | 9 (7) | 90% | 8% | 2% |
| <p><b>4.¿Se debe indicar la realización de una neuroimagen en el paciente con sospecha o diagnóstico de COVID-19 que desarrolla síntomas tales como cefalea persistente o anosmia?</b></p> <p>Se recomienda no realizar neuroimagen de rutina en pacientes críticos por COVID-19 con cefalea y anosmia, dado que no existe una evidencia concluyente que demuestre una estrecha correlación entre estos síntomas y hallazgos imagenológicos.</p> <p><b>Fuerte en contra</b></p>                                                                                                                                                                                                                                                                                                                                                                                                                                                                                                                                                                                                          | 9 (8) | 90% | 4% | 6% |
| <p><b>5.¿Cuál es la monitoria neurológica más apropiada para establecer en el paciente crítico</b></p>                                                                                                                                                                                                                                                                                                                                                                                                                                                                                                                                                                                                                                                                                                                                                                                                                                                                                                                                                                                   | 9 (8) | 90% | 6% | 4% |

|                                                                                                                                                                                                                                                                                                                                                                                                                                                                                                                                                                                                                                                                                                                                                                                                             |       |     |    |    |
|-------------------------------------------------------------------------------------------------------------------------------------------------------------------------------------------------------------------------------------------------------------------------------------------------------------------------------------------------------------------------------------------------------------------------------------------------------------------------------------------------------------------------------------------------------------------------------------------------------------------------------------------------------------------------------------------------------------------------------------------------------------------------------------------------------------|-------|-----|----|----|
| <p><b>con sospecha o diagnóstico de COVID-19 con y sin efectos de sedación?</b></p> <p>Se recomienda la valoración neurológica completa en los pacientes con sospecha o infección por COVID-19.</p> <p><b>Fuerte a favor</b></p> <p>Se recomienda la monitorización electroencefalográfica continua por al menos 24h o según la consideración del especialista en neurociencias en el paciente en estado crítico con sospecha o infección por COVID-19 en quien se sospeche crisis epilépticas o estatus no convulsivo.</p> <p><b>Fuerte a favor</b></p>                                                                                                                                                                                                                                                    |       |     |    |    |
| <p><b>6.¿Existe superioridad entre las alternativas de neuroimágenes disponibles para los pacientes con síntomas neurológicos con sospecha o con diagnóstico de infección por COVID-19?</b></p> <p>Se recomienda realizar tomografía cerebral simple ante las manifestaciones neurológicas focales que nos hagan sospechar ataque cerebrovascular isquémico o hemorrágico. La resonancia cerebral puede ser necesaria como estudio complementario para determinar otros diagnósticos diferenciales en los pacientes con sospecha o infección por COVID-19.</p> <p><b>Fuerte a favor</b></p>                                                                                                                                                                                                                 | 9 (8) | 92% | 6% | 2% |
| <p><b>7.¿Cuáles son las indicaciones de punción lumbar y pruebas complementarias en líquido cefalorraquídeo durante la atención del paciente crítico neurológico con sospecha o diagnóstico de COVID-19?</b></p> <p>Se recomienda la realización de punción lumbar en el paciente con sospecha o diagnóstico de COVID-19 con base en los reportes de casos disponibles:</p> <ul style="list-style-type: none"> <li>• Paciente con crisis epilépticas de Novo.</li> <li>• Paciente con alteración del estado de conciencia persistente a pesar de encontrarse metabólicamente compensado, descartado ataque cerebrovascular u otra causa de encefalopatía.</li> <li>• Paciente con manifestaciones como mielitis, neuropatía craneal múltiple o sospecha de polineuropatía desmielinizante aguda.</li> </ul> | 9 (8) | 88% | 8% | 4% |

|                                                                                                                                                                                                                                                                                                                                                                                                                                                                                                                                                                                                                                                                                                                                                                                                                                                                                                                                                                                                                                                                                                                                                                                                                                                                                       |       |     |    |    |
|---------------------------------------------------------------------------------------------------------------------------------------------------------------------------------------------------------------------------------------------------------------------------------------------------------------------------------------------------------------------------------------------------------------------------------------------------------------------------------------------------------------------------------------------------------------------------------------------------------------------------------------------------------------------------------------------------------------------------------------------------------------------------------------------------------------------------------------------------------------------------------------------------------------------------------------------------------------------------------------------------------------------------------------------------------------------------------------------------------------------------------------------------------------------------------------------------------------------------------------------------------------------------------------|-------|-----|----|----|
| <b>Fuerte a favor</b>                                                                                                                                                                                                                                                                                                                                                                                                                                                                                                                                                                                                                                                                                                                                                                                                                                                                                                                                                                                                                                                                                                                                                                                                                                                                 |       |     |    |    |
| <p><b>8.¿Cuándo se debe realizar medición de ácidos nucleicos por rt-PCR para SARS-CoV-2 en Líquido cefalorraquídeo durante la atención del paciente crítico con sospecha o diagnóstico de COVID-19?</b></p> <p>Se recomienda la medición de ácidos nucleicos por rt-PCR para SARS-CoV-2 en Líquido cefalorraquídeo en los pacientes con sospecha o confirmación de infección por S que realice crisis epilépticas de Novo, en quien se descarte otras causas de estructuralidad (ACV, tumores) o causas metabólicas (alteraciones hidroelectrolíticas, hipoglicemia, uremia etc.).</p> <p><b>Fuerte a favor</b></p> <p>Se recomienda la medición de ácidos nucleicos por rt-PCR para SARS-CoV-2 en Líquido cefalorraquídeo en pacientes con sospecha o confirmación de infección por SARS-CoV-2 con alteración franca del estado de conciencia, en quien se haya descartado como causante hipoxia, ataque cerebrovascular, alteración hidroelectrolítica o estatus no convulsivo mediante imágenes y electroencefalograma.</p> <p><b>Fuerte a favor</b></p> <p>Se recomienda la medición de ácidos nucleicos por rt-PCR para SARS-CoV-2 en Líquido cefalorraquídeo en pacientes con sospecha de Encefalitis, Mielitis o Síndrome de Guillain Barré.</p> <p><b>Fuerte a favor</b></p> | 9 (8) | 90% | 6% | 4% |
| <b>VI. Riñón y COVID-19</b>                                                                                                                                                                                                                                                                                                                                                                                                                                                                                                                                                                                                                                                                                                                                                                                                                                                                                                                                                                                                                                                                                                                                                                                                                                                           |       |     |    |    |
| <p><b>1.¿Cuáles intervenciones profilácticas y/o terapéuticas se pueden implementar para prevenir el riesgo de lesión renal aguda en pacientes adultos en estado crítico con sospecha clínica o diagnóstico de COVID-19?</b></p> <p>Se recomienda en los pacientes críticos con compromiso pulmonar por COVID-19, un manejo orientado de fluidos frente a una estrategia liberal, ajustando el balance de fluidos de acuerdo con la evaluación clínica y a la capacidad de respuesta a volumen para optimizar la perfusión renal.</p> <p><b>Fuerte a favor</b></p> <p>Se recomienda ajustar la intensidad de la monitoria en el paciente crítico con COVID-19 al grado de</p>                                                                                                                                                                                                                                                                                                                                                                                                                                                                                                                                                                                                         | 9 (8) | 96% | 4% | 0% |



|                                                                                                                                                                                                                                                                                                                                                                                                                                                                                                                                                                                                                                                                                                                                                                                                                                     |       |     |    |    |
|-------------------------------------------------------------------------------------------------------------------------------------------------------------------------------------------------------------------------------------------------------------------------------------------------------------------------------------------------------------------------------------------------------------------------------------------------------------------------------------------------------------------------------------------------------------------------------------------------------------------------------------------------------------------------------------------------------------------------------------------------------------------------------------------------------------------------------------|-------|-----|----|----|
| <p>severidad de la enfermedad para alcanzar tempranamente metas de reanimación que se reflejen en menor riesgo de lesión renal aguda.</p> <p><b>Fuerte a favor</b></p> <p>Se recomienda evitar el uso de medicamentos nefrotóxicos teniendo en cuenta la farmacocinética y farmacodinamia individual, así como las interacciones farmacológicas en el paciente crítico con COVID-19.</p> <p><b>Fuerte a favor</b></p>                                                                                                                                                                                                                                                                                                                                                                                                               |       |     |    |    |
| <p><b>2.¿Existen riesgos de lesión renal aguda relacionados a la politerapia antiviral para el manejo del paciente adulto en estado crítico con sospecha clínica o diagnóstico de COVID-19?</b></p> <p>Se recomienda no utilizar de forma rutinaria tratamientos específicos antivirales para el paciente crítico con COVID-19 con lesión renal aguda o crónica.</p> <p><b>Fuerte en contra</b></p> <p>Se recomienda no utilizar de rutina remdesivir en los pacientes con falla renal crónica y debe suspenderse en los pacientes que desarrollan lesión renal aguda con TFG &lt; 30 ml/min.</p> <p><b>Fuerte en contra</b></p> <p>Las intervenciones farmacológicas en los ensayos clínicos deben ajustarse a la farmacocinética y farmacodinamia específicas de cada molécula.</p> <p><b>Punto de buena práctica clínica</b></p> | 9 (7) | 90% | 6% | 4% |
| <p><b>3.¿Cuáles son las indicaciones, modalidad, tiempo de inicio sugerido y acceso vascular recomendado para iniciar terapia de soporte renal en el paciente con lesión renal aguda con sospecha clínica o diagnóstica de COVID-19?</b></p> <p>Se recomienda aplicar las indicaciones tradicionales de terapia de soporte renal en pacientes críticamente enfermos con COVID-19.</p> <p><b>Fuerte a favor</b></p> <p>Se recomienda el inicio de terapia de soporte renal en pacientes críticos con COVID-19 con hiperkalemia severa o acidosis metabólica severa, refractarias al manejo médico óptimo o cuando el balance positivo de fluidos es deletéreo, con mayor</p>                                                                                                                                                         | 9 (8) | 96% | 2% | 2% |

|                                                                                                                                                                                                                                                                                                                                                                                                                                                                                                                                                                                                                                                                                                                                                                                                                                                                                                                                                                                                                                                                                          |       |     |     |     |
|------------------------------------------------------------------------------------------------------------------------------------------------------------------------------------------------------------------------------------------------------------------------------------------------------------------------------------------------------------------------------------------------------------------------------------------------------------------------------------------------------------------------------------------------------------------------------------------------------------------------------------------------------------------------------------------------------------------------------------------------------------------------------------------------------------------------------------------------------------------------------------------------------------------------------------------------------------------------------------------------------------------------------------------------------------------------------------------|-------|-----|-----|-----|
| <p>requerimiento de oxígeno suplementario y que no responde a diuréticos.</p> <p><b>Fuerte a favor</b></p> <p>Se recomienda el inicio temprano de terapia de soporte renal dentro de las primeras 24 horas de una indicación absoluta, asegurando previamente una adecuada reanimación de la perfusión tisular. En ausencia de trastornos hidro-electrolíticos y severa sobrecarga de volumen, el tiempo de inicio de diálisis es controversial.</p> <p><b>Fuerte a favor</b></p> <p>Se recomienda en pacientes críticos con COVID-19 que requieren soporte renal, las modalidades de terapia continua o extendida si cursa con inestabilidad cardiovascular, de acuerdo con la disponibilidad institucional.</p> <p><b>Fuerte a favor</b></p> <p>Se debe considerar en pacientes críticos con COVID-19, que requieren inicio de soporte renal la vía femoral para inicio de la terapia y disminuir el riesgo de contaminación por proximidad, la siguiente vía se establecerá de acuerdo con la evolución y condiciones del paciente.</p> <p><b>Punto de buena práctica clínica</b></p> |       |     |     |     |
| <p><b>4.¿Cuál es la efectividad y seguridad de la TRRC más hemoperfusión en la fase de hiperinflamación en el paciente adulto en estado crítico con sospecha clínica o diagnóstico de COVID-19?</b></p> <p>Se sugiere no utilizar de rutina la TRRC más hemoperfusión en el paciente crítico con COVID-19.</p> <p><b>Débil en contra</b></p> <p>Se puede considerar en el paciente crítico con COVID-19 con lesión renal aguda en quien se inicie TRRC, la utilización de filtros de fibra hueca con propiedades adsorbtivas o asociado con cartuchos para hemoperfusión directa.</p> <p><b>Punto de buena práctica clínica</b></p>                                                                                                                                                                                                                                                                                                                                                                                                                                                      | 8 (7) | 79% | 12% | 9%  |
| <p><b>5.¿Cuál es la efectividad y seguridad de la plasmaféresis terapéutica en la fase de hiper inflamación en el paciente adulto en estado crítico con sospecha clínica o diagnóstico de COVID-19?</b></p>                                                                                                                                                                                                                                                                                                                                                                                                                                                                                                                                                                                                                                                                                                                                                                                                                                                                              | 7 (5) | 62% | 22% | 16% |

|                                                                                                                                                                                                                                                                                                                                                                                                                                                                       |       |     |    |    |
|-----------------------------------------------------------------------------------------------------------------------------------------------------------------------------------------------------------------------------------------------------------------------------------------------------------------------------------------------------------------------------------------------------------------------------------------------------------------------|-------|-----|----|----|
| No se puede emitir una recomendación a favor o en contra sobre el uso rutinario de la plasmaféresis como opción terapéutica en la fase de inflamación del paciente con COVID-19.                                                                                                                                                                                                                                                                                      |       |     |    |    |
| <b>VII. Intervenciones terapéuticas y COVID-19</b>                                                                                                                                                                                                                                                                                                                                                                                                                    |       |     |    |    |
| <p><b>1. ¿Es superior el tratamiento específico dirigido al SARS-CoV-2 frente a manejo solo de soporte en UCI en el paciente con sospecha o diagnóstico de COVID-19 en desenlaces clínicos fuertes?</b></p> <p>Se recomienda no utilizar de forma rutinaria el uso de un tratamiento específico dirigido a pacientes con infección por SARS-CoV-2/COVID-19 comparado con el manejo estándar para mejorar desenlaces clínicos fuertes.<br/><b>Fuerte en contra</b></p> | 9 (8) | 88% | 8% | 4% |
| <p><b>2. ¿En pacientes hospitalizados con sospecha o diagnóstico de COVID-19 se recomienda el uso de antimaláricos tipo hidroxicloroquina (HCQ) o cloroquina (CQ) comparado con no dar tratamiento?</b></p> <p>Se recomienda no utilizar antimaláricos tipo hidroxicloroquina (HCQ) o cloroquina (CQ) para el manejo de pacientes con infección por SARS-CoV-2/COVID-19.<br/><b>Fuerte en contra</b></p>                                                              | 9 (9) | 90% | 6% | 4% |
| <p><b>3. ¿En pacientes hospitalizados con sospecha o diagnóstico de COVID-19 se puede administrar tratamiento con hidroxicloroquina y azitromicina comparado con no hacerlo o el uso solo de la hidroxicloroquina?</b></p> <p>Se recomienda no utilizar antimaláricos tipo hidroxicloroquina (HCQ) o cloroquina (CQ) en combinación con azitromicina (AZ) para el manejo de pacientes con infección por SARS-CoV-2/COVID-19.<br/><b>Fuerte en contra</b></p>          | 9 (9) | 92% | 6% | 2% |
| <p><b>4. ¿En pacientes hospitalizados con sospecha o diagnóstico de COVID-19 se recomienda el uso de antivirales tipo lopinavir/ritonavir comparado con no dar tratamiento?</b></p> <p>Se recomienda no utilizar de forma rutinaria el uso rutinario del Lopinavir/Ritonavir para el manejo de</p>                                                                                                                                                                    | 9 (9) | 84% | 8% | 8% |

|                                                                                                                                                                                                                                                                                                                                                                                                                                                                                                                                    |       |     |     |     |
|------------------------------------------------------------------------------------------------------------------------------------------------------------------------------------------------------------------------------------------------------------------------------------------------------------------------------------------------------------------------------------------------------------------------------------------------------------------------------------------------------------------------------------|-------|-----|-----|-----|
| pacientes con infección por SARS-CoV-2/COVID-19.<br><b>Fuerte en contra</b>                                                                                                                                                                                                                                                                                                                                                                                                                                                        |       |     |     |     |
| <b>5.¿En pacientes hospitalizados con sospecha o diagnóstico de COVID-19 se recomienda el uso de antivirales tipo remdesivir comparado con no dar tratamiento?</b><br><br>Se recomienda no utilizar de rutina remdesivir como antiviral para el manejo de pacientes con infección por SARS-CoV-2/COVID-19. Se debe considerar su uso en escenarios de estudios de investigación clínica aprobados.<br><b>Fuerte en contra</b>                                                                                                      | 9 (8) | 88% | 8%  | 4%  |
| <b>6.¿En pacientes hospitalizados con sospecha o diagnóstico de COVID-19 se recomienda el uso de ivermectina comparado con no dar tratamiento?</b><br><br>Se recomienda no utilizar de rutina la Ivermectina para el manejo de pacientes con infección por SARS-CoV-2/COVID-19.<br><b>Fuerte en contra</b>                                                                                                                                                                                                                         | 9 (7) | 80% | 6%  | 14% |
| <b>7.¿Es efectivo y seguro el tratamiento compasivo con Tocilizumab en los pacientes críticos con sospecha clínica o diagnóstico de COVID-19 severo?</b><br><br>No se puede emitir una recomendación a favor o en contra sobre el uso compasivo o rutinario de tocilizumab en pacientes con infección por SARS-CoV-2/COVID-19.<br><br>En pacientes individualizados se ha reportado desenlaces clínicos favorables. Se puede considerar su uso en pacientes que cumplan con todos los siguientes criterios: <u>(ver tabla 17).</u> | 8 (5) | 65% | 19% | 16% |
| <b>8.¿Es efectivo y seguro el tratamiento compasivo con bloqueadores de interleuquina-1 (anakinra) en los pacientes críticos con sospecha clínica o diagnóstico de COVID-19 severo?</b><br><br>Se recomienda no utilizar de rutina bloqueadores de interleuquina-1 (Anakinra) en pacientes con infección por SARS-CoV-2/COVID-19.<br><b>Fuerte en contra</b>                                                                                                                                                                       | 9 (7) | 80% | 12% | 8%  |

|                                                                                                                                                                                                                                                                                                                                                                                                                                                                                                                                                                                                                                                                                                                                                                                                                                                                                                                                                                                                                                                                                                                                                                              |       |     |     |     |
|------------------------------------------------------------------------------------------------------------------------------------------------------------------------------------------------------------------------------------------------------------------------------------------------------------------------------------------------------------------------------------------------------------------------------------------------------------------------------------------------------------------------------------------------------------------------------------------------------------------------------------------------------------------------------------------------------------------------------------------------------------------------------------------------------------------------------------------------------------------------------------------------------------------------------------------------------------------------------------------------------------------------------------------------------------------------------------------------------------------------------------------------------------------------------|-------|-----|-----|-----|
| <p><b>9.¿Es efectivo y seguro el tratamiento con Interferón en los pacientes con sospecha clínica o diagnóstico de COVID-19 severo?</b></p> <p>Se sugiere que la terapia con interferón B sólo sea considerada en pacientes con formas graves de infección por COVID-19 en el marco de un ensayo clínico.</p> <p><b>Débil a favor</b></p>                                                                                                                                                                                                                                                                                                                                                                                                                                                                                                                                                                                                                                                                                                                                                                                                                                    | 8 (7) | 76% | 12% | 12% |
| <p><b>10.¿En pacientes hospitalizados con sospecha o diagnóstico de COVID-19 el uso de corticoides sistémicos modifica el curso clínico de la enfermedad o genera beneficios en desenlaces clínicos de interés?</b></p> <p>Se sugiere no utilizar de rutina corticoides en el tratamiento de pacientes con sospecha o diagnóstico de COVID-19. No se puede considerar su uso profiláctico ni en pacientes con enfermedad leve sin requerimiento de oxígeno.</p> <p><b>Débil en contra</b></p>                                                                                                                                                                                                                                                                                                                                                                                                                                                                                                                                                                                                                                                                                | 8 (7) | 75% | 17% | 8%  |
| <p><b>11.¿Es efectivo y seguro la inmunización pasiva con plasma convaleciente de pacientes recuperados para profilaxis y tratamiento de pacientes con sospecha o diagnóstico de COVID-19?</b></p> <p>Se recomienda no utilizar plasma convaleciente como tratamiento de rutina en paciente con SARS-CoV-2 - COVID-19. Se debe considerar su uso en el marco de un ensayo clínico y con alguno de los dos escenarios siguientes:</p> <ul style="list-style-type: none"> <li>- Escenario A (enfermedad severa), definida como uno o más de los siguientes: disnea, frecuencia respiratoria &gt; 30/min, SpO2 &lt; 93%, PaO2/FiO2 &lt; 300 o empeoramiento radiológico con aumento &gt; 50% de los infiltrados pulmonares en 24 – 48 horas.</li> <li>- Escenario B (enfermedad que amenaza la vida), definida como uno o más de los siguientes: falla respiratoria, choque séptico, o disfunción multiorgánica.</li> </ul> <p><b>Fuerte en contra</b></p> <p>Se recomienda no utilizar plasma convaleciente para profilaxis clínica de rutina contra la infección por SARS-CoV-2, sólo se debe considerar en el marco de un ensayo clínico.</p> <p><b>Fuerte en contra</b></p> | 9 (7) | 80% | 12% | 8%  |

|                                                                                                                                                                                                                                                                                                                                                                                                                                                                                                                                                                                                                                                                                                                                                                                                                                                                                                                                                                                                                                                                                           |       |      |     |     |
|-------------------------------------------------------------------------------------------------------------------------------------------------------------------------------------------------------------------------------------------------------------------------------------------------------------------------------------------------------------------------------------------------------------------------------------------------------------------------------------------------------------------------------------------------------------------------------------------------------------------------------------------------------------------------------------------------------------------------------------------------------------------------------------------------------------------------------------------------------------------------------------------------------------------------------------------------------------------------------------------------------------------------------------------------------------------------------------------|-------|------|-----|-----|
| <p><b>12. ¿Es efectivo y seguro las inmunoglobulinas hiperinmunes para el tratamiento de pacientes con sospecha o diagnóstico de COVID-19?</b></p> <p>Se recomienda no utilizar de rutina las inmunoglobulinas hiperinmunes para el tratamiento de pacientes con infección por SARS-CoV-2/COVID-19.</p> <p><b>Fuerte en contra</b></p>                                                                                                                                                                                                                                                                                                                                                                                                                                                                                                                                                                                                                                                                                                                                                    | 9 (8) | 88%  | 10% | 2%  |
| <p><b>13. ¿Es efectivo y seguro la inmunoglobulina intravenosa para el tratamiento de pacientes con sospecha o diagnóstico de COVID-19?</b></p> <p>No se puede emitir una recomendación a favor o en contra para el uso de la inmunoglobulina intravenosa como tratamiento adyuvante en pacientes con COVID-19 severo.</p> <p>Se debe considerar la inmunoglobulina intravenosa como tratamiento adyuvante en pacientes con COVID-19 severo, solo en el contexto de ensayos clínicos en los siguientes escenarios.</p> <ul style="list-style-type: none"> <li>• Escenario A (enfermedad severa), definida como uno o más de los siguientes: disnea, frecuencia respiratoria &gt; 30/min, SpO<sub>2</sub> &lt; 93%, PaO<sub>2</sub>/FiO<sub>2</sub> &lt; 300 o empeoramiento radiológico con aumento &gt; 50% de los infiltrados pulmonares en 24 – 48 horas.</li> <li>• Escenario B (enfermedad que amenaza la vida), definida como uno o más de los siguientes: falla respiratoria, choque séptico, o disfunción multiorgánica.</li> </ul> <p><b>Punto de buena práctica clínica</b></p> | 8 (6) | 72%  | 16% | 12% |
| <p><b>14. ¿En pacientes hospitalizados con sospecha clínica o diagnóstico de COVID-19 severo se recomienda el uso de tromboprofilaxis comparado con no dar tratamiento?</b></p> <p>Se recomienda la tromboprofilaxis farmacológica en todos los pacientes confirmados o sospechosos de COVID-19 severo, a menos que está contraindicada, en cuyo caso es razonable la implementación de profilaxis no farmacológica.</p> <p><b>Fuerte a favor</b></p>                                                                                                                                                                                                                                                                                                                                                                                                                                                                                                                                                                                                                                     | 9 (9) | 100% | 0%  | 0%  |

|                                                                                                                                                                                                                                                                                                                                                                                                                                                                                                                                                    |       |     |     |     |
|----------------------------------------------------------------------------------------------------------------------------------------------------------------------------------------------------------------------------------------------------------------------------------------------------------------------------------------------------------------------------------------------------------------------------------------------------------------------------------------------------------------------------------------------------|-------|-----|-----|-----|
| <p><b>15.¿En pacientes hospitalizados con sospecha clínica o diagnóstico de COVID-19 severo se recomienda el uso de tromboprofilaxis comparado con no dar tratamiento?</b></p> <p>Se recomienda no utilizar de rutina antiagregación en pacientes con COVID-19 severo con el fin de prevenir desenlaces neurológicos adversos.<br/><b>Fuerte en contra</b></p>                                                                                                                                                                                     | 9 (8) | 88% | 10% | 2%  |
| <p><b>16.¿Es efectivo y seguro el uso rutinario de anticoagulación para la atención de pacientes con sospecha clínica o diagnóstico de COVID-19 severo?</b></p> <p>No se puede emitir una recomendación a favor o en contra sobre el uso de la anticoagulación terapéutica de rutina con heparinas de bajo peso molecular o heparina no fraccionada en pacientes con bajo riesgo de sangrado y con un curso clínico grave o crítico, que además tengan elevación del Dímero D mayor a 1 mcg/ml (1000 ng/ml) y/o fibrinógeno mayor a 900 mg/dl.</p> | 8 (6) | 72% | 16% | 12% |
| <p><b>17.¿Es efectivo y seguro iniciar anticoagulación basado en niveles de dímero-D solo en comparación con la combinación de niveles de dímero-D y confirmación clínica de trombosis en pacientes hospitalizados con sospecha o diagnóstico de COVID-19?</b></p> <p>No se puede emitir una recomendación a favor o en contra sobre la anticoagulación terapéutica de rutina con heparinas de bajo peso molecular en pacientes con COVID-19 en estado crítico, que presenten elevación del Dímero D mayor a 1 mcg/ml (1000 ng/ml).</p>            | 8 (6) | 72% | 12% | 16% |
| <p><b>18.¿En pacientes hospitalizados con sospecha o diagnóstico de COVID-19 bajo tratamiento anticoagulante con HBPM, se recomienda la monitorización rutinaria en comparación con la medición de niveles de anti Xa?</b></p> <p>No se puede emitir una recomendación a favor o en contra para la medición rutinaria de niveles de antiXa en pacientes con COVID-19 en los que se decide hacer anticoagulación terapéutica con HBPM.</p> <p>Se puede considerar la medición de niveles antiXa si se cuenta con la disponibilidad del recurso.</p> | 9 (5) | 73% | 10% | 17% |

|                                                                                                                                                                                                                                                                                                                                                                                                                                                                                                                                                                                                                                                                                                                                                                                                                                                                                                                                                                                                                                                                                                                                                                                                                                                                                                                                                                                                                                                                                                            |       |     |    |    |
|------------------------------------------------------------------------------------------------------------------------------------------------------------------------------------------------------------------------------------------------------------------------------------------------------------------------------------------------------------------------------------------------------------------------------------------------------------------------------------------------------------------------------------------------------------------------------------------------------------------------------------------------------------------------------------------------------------------------------------------------------------------------------------------------------------------------------------------------------------------------------------------------------------------------------------------------------------------------------------------------------------------------------------------------------------------------------------------------------------------------------------------------------------------------------------------------------------------------------------------------------------------------------------------------------------------------------------------------------------------------------------------------------------------------------------------------------------------------------------------------------------|-------|-----|----|----|
| <p><b>19.¿En pacientes hospitalizados con sospecha o diagnóstico de COVID-19 en quien se decide anticoagulación terapéutica se recomienda heparinas de bajo peso molecular comparado con heparina no fraccionada?</b></p> <p>Se recomienda el uso de HBPM o HNF para la anticoagulación terapéutica en pacientes con una indicación específica con diagnóstico de COVID-19.</p> <p><b>Fuerte a favor</b></p>                                                                                                                                                                                                                                                                                                                                                                                                                                                                                                                                                                                                                                                                                                                                                                                                                                                                                                                                                                                                                                                                                               | 9 (8) | 94% | 4% | 2% |
| <b>VIII. Procedimientos y COVID-19</b>                                                                                                                                                                                                                                                                                                                                                                                                                                                                                                                                                                                                                                                                                                                                                                                                                                                                                                                                                                                                                                                                                                                                                                                                                                                                                                                                                                                                                                                                     |       |     |    |    |
| <p><b>1.¿Cuál es la mejor estrategia de preoxigenación antes de la intubación orotraqueal para garantizar la seguridad en el personal de salud y menor número de complicaciones?</b></p> <p>Se recomienda realizar la preoxigenación en pacientes con sospecha o diagnóstico de COVID-19, cuando estén disponibles, en áreas de presión negativa con mínimo 12 recambios de aire por hora o en instalaciones con ventilación natural o que tengan un recambio de aire de mínimo 160 l/seg si están disponibles.</p> <p><b>Fuerte a favor</b></p> <p>Se recomienda como complemento opcional durante la preoxigenación en el paciente crítico con diagnóstico o sospecha de COVID-19 la caja de acrílico para protección durante la intubación, la caja no protege contra la generación de aerosoles fuera de esta y requiere para su uso, entrenamiento previo. Si es difícil su uso se debe retirar inmediatamente.</p> <p><b>Fuerte a favor</b></p> <p>Se recomienda utilizar la mascarilla quirúrgica sobre la mascarilla de oxigenación en el paciente crítico con sospecha o diagnóstico de COVID-19.</p> <p><b>Fuerte a favor</b></p> <p>Se recomienda utilizar filtros HPFA entre la máscara y el dispositivo disponible para la preoxigenación en el paciente crítico con sospecha o diagnóstico de COVID-19.</p> <p><b>Fuerte a favor</b></p> <p>Se recomienda en el paciente con sospecha o diagnóstico de COVID-19 preoxigenación por 3 a 5 min, si el paciente luego de 3 minutos no tiene</p> | 9 (8) | 96% | 4% | 0% |



|                                                                                                                                                                                                                                                                                                                                                                                                                                                                                                                                                                                                                                                                                                                                                                                                                                                                                                                                                                                                                                                                                                                                                                                                                                                                                                                                                                                                                                                                                                                                                                                       |       |     |    |    |
|---------------------------------------------------------------------------------------------------------------------------------------------------------------------------------------------------------------------------------------------------------------------------------------------------------------------------------------------------------------------------------------------------------------------------------------------------------------------------------------------------------------------------------------------------------------------------------------------------------------------------------------------------------------------------------------------------------------------------------------------------------------------------------------------------------------------------------------------------------------------------------------------------------------------------------------------------------------------------------------------------------------------------------------------------------------------------------------------------------------------------------------------------------------------------------------------------------------------------------------------------------------------------------------------------------------------------------------------------------------------------------------------------------------------------------------------------------------------------------------------------------------------------------------------------------------------------------------|-------|-----|----|----|
| <p>incremento en la pulsioximetría inicie la administración de medicamentos.</p> <p><b>Fuerte a favor</b></p> <p>Se recomienda en caso de compromiso hemodinámico considerar ventilación a dos manos con cierre hermético de la máscara sobre la cara del paciente con frecuencias altas (&gt;25 por minuto y baja presión).</p> <p><b>Fuerte a favor</b></p>                                                                                                                                                                                                                                                                                                                                                                                                                                                                                                                                                                                                                                                                                                                                                                                                                                                                                                                                                                                                                                                                                                                                                                                                                         |       |     |    |    |
| <p><b>2.¿Cuáles son las estrategias recomendadas para lograr una intubación oro traqueal efectiva en el paciente con sospecha o diagnóstico de COVID-19 y garantizar seguridad para la protección del personal de salud?</b></p> <p>Se recomienda la utilización de cajas de acrílico para intubación del paciente con sospecha o diagnóstico de COVID-19 como complemento durante la intubación para disminuir el riesgo de contaminación por gotas, sin embargo, no protege 100 % la generación de aerosoles y si ésta hace más difícil la intubación se debe retirar inmediatamente.</p> <p><b>Fuerte a favor</b></p> <p>Se recomienda minimizar los intentos de intubación orotraqueal en el paciente con sospecha o diagnóstico de COVID-19, el primer intento debe procurar ser realizado por el más experimentado en el manejo de la vía aérea.</p> <p><b>Fuerte a favor</b></p> <p>Se recomienda la intubación con videolaringoscopia en pacientes con COVID-19 (teniendo en cuenta disponibilidad y entrenamiento); esta alternativa puede ofrecer ventajas frente a la laringoscopia convencional.</p> <p><b>Fuerte a favor</b></p> <p>Se recomienda administrar medicamentos para asegurar la vía aérea en secuencia de inducción rápida, para obtener en el menor tiempo posible condiciones para la intubación (45 a 60 s).</p> <p><b>Fuerte a favor</b></p> <p>Se recomienda en caso de intubación fallida por personal experto, considerar dispositivos supraglóticos como las máscaras laríngeas como medida de rescate con el riesgo de generación de aerosoles.</p> | 9 (8) | 88% | 8% | 4% |

|                                                                                                                                                                                                                                                                                                                                                                                                                                                                                                                                                                                  |       |     |     |    |
|----------------------------------------------------------------------------------------------------------------------------------------------------------------------------------------------------------------------------------------------------------------------------------------------------------------------------------------------------------------------------------------------------------------------------------------------------------------------------------------------------------------------------------------------------------------------------------|-------|-----|-----|----|
| <p><b>Fuerte a favor</b></p> <p>Se recomienda contar con disponibilidad de vasopresor y atropina preparados en el sitio donde se realizará la intubación. En caso de contar con lidocaína se recomienda utilizar a dosis de 1 mg/kg sin epinefrina. Administrada 3 minutos antes de la intubación.</p> <p><b>Fuerte a favor</b></p>                                                                                                                                                                                                                                              |       |     |     |    |
| <p><b>3.¿La intubación orotraqueal y el inicio temprano de la ventilación mecánica invasiva están relacionado con mejores desenlaces en el paciente con sospecha o diagnóstico de COVID-19?</b></p> <p>Se recomienda la intubación orotraqueal oportuna y no retrasar el inicio de la ventilación mecánica invasiva en los pacientes con SDRA severo por COVID-19 debido a mayor riesgo de desenlaces adversos.</p> <p><b>Fuerte a favor</b></p>                                                                                                                                 | 9 (8) | 86% | 10% | 4% |
| <p><b>4.¿Cuáles son las indicaciones para realizar intubación orotraqueal en el paciente con sospecha o diagnóstico confirmado de COVID-19?</b></p> <p>Se recomienda tomar la decisión de intubación orotraqueal en el paciente crítico con sospecha o diagnóstico de COVID-19 utilizando una combinación de variables clínicas, gasométricas y hemodinámicas. <u>Ver tabla 20.</u></p> <p><b>Fuerte a favor</b></p>                                                                                                                                                             | 9 (8) | 94% | 4%  | 2% |
| <p><b>5.¿Es segura la realización de broncoscopia diagnóstica o terapéutica en pacientes con sospecha o diagnóstico de COVID-19?</b></p> <p>Se recomienda no realizar de rutina broncoscopia en los pacientes con sospecha o diagnóstico de COVID-19, debido al riesgo de generación de aerosoles.</p> <p><b>Fuerte en contra</b></p> <p>Se puede considerar en atelectasias masivas con compromiso significativo de la oxigenación adicional a la lesión pulmonar per sé y la hemorragia alveolar para control local directo.</p> <p><b>Punto de buena práctica clínica</b></p> | 9 (8) | 90% | 8%  | 2% |

|                                                                                                                                                                                                                                                                                                                                                                                                                                                                                                                                                                                                                                                                                                                                                                                                                                                                                                                                                                         |       |     |    |     |
|-------------------------------------------------------------------------------------------------------------------------------------------------------------------------------------------------------------------------------------------------------------------------------------------------------------------------------------------------------------------------------------------------------------------------------------------------------------------------------------------------------------------------------------------------------------------------------------------------------------------------------------------------------------------------------------------------------------------------------------------------------------------------------------------------------------------------------------------------------------------------------------------------------------------------------------------------------------------------|-------|-----|----|-----|
| <p><b>6.¿Existe indicación de realización de broncoscopia para la toma de muestra para la PCR para SARS-CoV-2?</b></p> <p>Se recomienda no realizar de rutina broncoscopia para la recolección de muestras para el diagnóstico de COVID-19 en el paciente críticamente enfermo.</p> <p><b>Fuerte en contra</b></p>                                                                                                                                                                                                                                                                                                                                                                                                                                                                                                                                                                                                                                                      | 9 (7) | 82% | 8% | 10% |
| <p><b>7.¿Cuál es el momento apropiado para la realización de traqueostomía en pacientes con COVID-19?</b></p> <p>Se recomienda la realización de la traqueostomía cuando está indicada, en los pacientes COVID-19 sospechosos y confirmados con pronóstico razonable de vida, después del 5 o 7 día de ventilación , previa valoración y consenso por el equipo quirúrgico y de cuidado intensivo, asegurando que las condiciones clínicas, ventilatorias y hemodinámicas se encuentran controlada.</p> <p><b>Fuerte a favor</b></p>                                                                                                                                                                                                                                                                                                                                                                                                                                    | 9 (7) | 92% | 6% | 2%  |
| <p><b>8.¿Es segura la realización de traqueostomía en el paciente con sospecha o diagnóstico de COVID-19?</b></p> <p>No existe evidencia que permita evaluar el riesgo real de infección del personal asistencial de los pacientes con sospecha o diagnóstico de COVID-19 en la realización de traqueostomías.</p> <p><b>Punto de buena práctica clínica</b></p> <p>Se debe considerar en la traqueostomía y la realización de ésta como un procedimiento generador de aerosoles (organización mundial de la salud).</p> <p><b>Punto de buena práctica clínica</b></p> <p>Se recomienda que los EPP requeridos para la realización del procedimiento, deben incluir máscaras FFP3 o N95, protección ocular, vestido antifluído idealmente desechable y guantes; este nivel de protección representa el mayor nivel de seguridad para realizar el procedimiento en el paciente con sospecha o diagnóstico de COVID-19.</p> <p><b>Punto de buena práctica clínica</b></p> | 9 (8) | 96% | 4% | 0%  |

|                                                                                                                                                                                                                                                                                                                                                                                                                                                                                                                                                                                                                                                                                                                                                                                                                                                                                                                                                                                          |       |     |     |    |
|------------------------------------------------------------------------------------------------------------------------------------------------------------------------------------------------------------------------------------------------------------------------------------------------------------------------------------------------------------------------------------------------------------------------------------------------------------------------------------------------------------------------------------------------------------------------------------------------------------------------------------------------------------------------------------------------------------------------------------------------------------------------------------------------------------------------------------------------------------------------------------------------------------------------------------------------------------------------------------------|-------|-----|-----|----|
| <p><b>9.¿Es necesario la negativización de la PCR para SARS-CoV-2 previo a la realización de traqueostomía en pacientes con COVID-19?</b></p> <p>Se recomiendan no esperar la negativización de la PCR para SARS-CoV-2 para realizar la traqueostomía en el paciente con diagnóstico de COVID-19.<br/><b>Fuerte en contra</b></p>                                                                                                                                                                                                                                                                                                                                                                                                                                                                                                                                                                                                                                                        | 9 (7) | 86% | 14% | 0% |
| <p><b>10.¿En el paciente adulto crítico con sospecha o diagnóstico de COVID-19 que va a ser sometido a traqueostomía la técnica percutánea frente a la abierta es más segura y efectiva?</b></p> <p>Se recomienda escoger la técnica teniendo en cuenta la experticia que tenga en el grupo tratante y la anatomía del paciente para la decisión de la técnica.<br/><b>Fuerte a favor</b></p> <p>Se recomienda la guía ecográfica para disminuir la probabilidad de complicaciones del procedimiento si la anatomía es desfavorable para la realización de traqueostomía percutánea.<br/><b>Fuerte a favor</b></p> <p>Se recomienda la traqueostomía quirúrgica en pacientes de riesgo elevado de complicaciones donde se requiere un control más rápido y seguro de la vía aérea.<br/><b>Fuerte a favor</b></p> <p>Se recomienda no utilizar de forma rutinaria la utilización de broncoscopia para la realización de traqueostomía por vía percutánea.<br/><b>Fuerte en contra</b></p> | 9 (8) | 94% | 6%  | 0% |
| <p><b>11.¿Cuáles pacientes con sospecha o diagnóstico de COVID-19 se benefician de la terapia ECMO VV en el contexto de la pandemia por SARS-CoV-2?</b></p> <p>Se recomienda el uso de la terapia ECMO en SDRA severo refractario por COVID-19 (PaO<sub>2</sub>/FIO<sub>2</sub> &lt; 150, posición prona, requerimiento de relajantes neuromusculares en algunos casos vasodilatadores pulmonares y maniobras de reclutamientos) sin respuesta clínica manifestado por:</p> <ul style="list-style-type: none"> <li>• PaO<sub>2</sub>/FIO<sub>2</sub> &lt; 60 mmHg por más de 6 horas</li> </ul>                                                                                                                                                                                                                                                                                                                                                                                          | 9 (7) | 90% | 2%  | 8% |

|                                                                                                                                                                                                                                                                                                                                                                                                                                                                                                                                                                                                                                                                                                                                                                                                                                                                                                                                                                                                                                                                                                                                                                                                                                   |       |     |     |    |
|-----------------------------------------------------------------------------------------------------------------------------------------------------------------------------------------------------------------------------------------------------------------------------------------------------------------------------------------------------------------------------------------------------------------------------------------------------------------------------------------------------------------------------------------------------------------------------------------------------------------------------------------------------------------------------------------------------------------------------------------------------------------------------------------------------------------------------------------------------------------------------------------------------------------------------------------------------------------------------------------------------------------------------------------------------------------------------------------------------------------------------------------------------------------------------------------------------------------------------------|-------|-----|-----|----|
| <ul style="list-style-type: none"> <li>• PaO<sub>2</sub>/FIO<sub>2</sub> &lt; 50 mmHg por más de 3 horas</li> <li>• pH &lt; 7.20 + paCO<sub>2</sub> &gt; 80 mmHg por más de 6 horas.</li> </ul> <p>Además del criterio anterior, se recomienda tener en cuenta la edad, las comorbilidades y la expectativa de sobrevida del paciente con buena calidad de vida y en circunstancias donde no exista limitación de recursos.</p> <p><b>Fuerte a favor</b></p>                                                                                                                                                                                                                                                                                                                                                                                                                                                                                                                                                                                                                                                                                                                                                                      |       |     |     |    |
| <p><b>12.¿Es necesario crear nuevos centros de ECMO para la atención de pacientes durante la pandemia por SARS-CoV-2?</b></p> <p>Se recomienda no desarrollar nuevos centros de ECMO en época de pandemia, sobre todo en situaciones con limitación de recursos.</p> <p><b>Fuerte en contra</b></p>                                                                                                                                                                                                                                                                                                                                                                                                                                                                                                                                                                                                                                                                                                                                                                                                                                                                                                                               | 9 (8) | 86% | 10% | 4% |
| <b>IX. Enfermería y COVID-19</b>                                                                                                                                                                                                                                                                                                                                                                                                                                                                                                                                                                                                                                                                                                                                                                                                                                                                                                                                                                                                                                                                                                                                                                                                  |       |     |     |    |
| <p><b>1.¿Cuáles son las estrategias de cuidado de enfermería del paciente adulto con sospecha o diagnóstico por COVID-19, para la prevención de infecciones asociadas a la atención en salud?</b></p> <p>Se recomienda practicar e implementar medidas de capacitación y vigilancia continua para mejorar la higiene de manos, evaluando la adherencia a protocolos establecidos en los trabajadores de la salud mediante listas de chequeo y supervisión para evitar infecciones cruzadas en el entorno del paciente con sospecha o diagnóstico de COVID-19.</p> <p><b>Fuerte a favor</b></p> <p>Se recomienda establecer protocolos específicos para reducir el riesgo de infecciones que se deriven de la interacción y el cuidado del paciente crítico con sospecha o diagnóstico de COVID-19.</p> <p><b>Fuerte a favor</b></p> <p>Se recomienda implementar prácticas de cuidado para la prevención de contagio de COVID-19. Se debe utilizar el equipo de protección personal (EPP) adecuado para la prevención de acuerdo al riesgo de exposición específico: gotas, aerosoles y fluidos corporales, derivado de la atención del paciente crítico con sospecha o diagnóstico de COVID-19.</p> <p><b>Fuerte a favor</b></p> | 9 (8) | 98% | 2%  | 0% |

|                                                                                                                                                                                                                                                                                                                                                                                                                                                                                                                                                                                                                                                                                                                                                                                                                                                                                                                                       |       |      |    |    |
|---------------------------------------------------------------------------------------------------------------------------------------------------------------------------------------------------------------------------------------------------------------------------------------------------------------------------------------------------------------------------------------------------------------------------------------------------------------------------------------------------------------------------------------------------------------------------------------------------------------------------------------------------------------------------------------------------------------------------------------------------------------------------------------------------------------------------------------------------------------------------------------------------------------------------------------|-------|------|----|----|
|                                                                                                                                                                                                                                                                                                                                                                                                                                                                                                                                                                                                                                                                                                                                                                                                                                                                                                                                       |       |      |    |    |
| <p><b>2.¿Cuáles estrategias por enfermería deben implementarse para disminuir los tiempos de intervención y ahorro de EPP en el cuidado de los pacientes con COVID-19 y disminuir el riesgo de infección del personal?</b></p> <p>Se recomienda realizar un plan de cuidados organizado y específico en paciente crítico con sospecha o diagnóstico de COVID-19, ofreciendo el uso óptimo de recursos e intervenciones.</p> <p><b>Fuerte a favor</b></p> <p>Se recomienda evitar el uso excesivo de papelería relacionada con los registros usados para gestión de insumos y atención de los pacientes.</p> <p><b>Fuerte a favor</b></p> <p>Se recomienda realizar intervenciones educativas enfocadas a mejorar la adherencia y adecuado uso de los EPP. Se debe procurar el cuidado de los elementos de protección personal bajo un protocolo que conserve las condiciones de integridad de estos.</p> <p><b>Fuerte a favor</b></p> | 9 (8) | 98%  | 2% | 0% |
| <p><b>3.¿Cuáles estrategias de prevención por enfermería se pueden implementar para la prevención de lesiones por presión en el paciente con COVID-19 bajo ventilación mecánica en prono y no prono?</b></p> <p>Se recomienda elaborar un protocolo de pronación del paciente críticamente enfermo por COVID-19, garantizando el entrenamiento al personal de salud, organizando el recurso humano, dispositivos de apoyo y tiempo establecido para cambios de posición para prevenir las lesiones por presión en el paciente.</p> <p><b>Fuerte a favor</b></p>                                                                                                                                                                                                                                                                                                                                                                       | 9 (9) | 100% | 0% | 0% |
| <p><b>4.¿Cuál es la efectividad de las intervenciones de apoyo a los profesionales del equipo sanitario que atienden a los pacientes con sospecha o diagnóstico de COVID-19 para prevenir crisis y desgaste?</b></p> <p>Se recomienda promover actividades para controlar el nivel de estrés en el personal durante las jornadas de trabajo: identificar y reconocer los propios límites, buscar o proponer ayuda psicológica profesional cuando sea requerido,</p>                                                                                                                                                                                                                                                                                                                                                                                                                                                                   | 9 (9) | 98%  | 2% | 0% |

|                                                                                                                                                                                                                                                                                                                                                                                                                                                                                                                                                                                                                                                                                                                                                                                                                                                                                                                                                                                                                                               |       |     |    |    |
|-----------------------------------------------------------------------------------------------------------------------------------------------------------------------------------------------------------------------------------------------------------------------------------------------------------------------------------------------------------------------------------------------------------------------------------------------------------------------------------------------------------------------------------------------------------------------------------------------------------------------------------------------------------------------------------------------------------------------------------------------------------------------------------------------------------------------------------------------------------------------------------------------------------------------------------------------------------------------------------------------------------------------------------------------|-------|-----|----|----|
| <p>promover estilos de vida saludables, y organizar los turnos de trabajo asegurando periodos de descanso.</p> <p><b>Fuerte a favor</b></p> <p>Se recomienda compartir las emociones con pares y superiores, analizar objetivamente las situaciones adversas, manejar fuentes de información objetivas y científicas, realizar pausas activas durante el turno y brindar espacios grupales para expresar emociones, miedos e incentivar al equipo de trabajo reconociendo su labor.</p> <p><b>Fuerte a favor</b></p> <p>Se recomienda utilizar recursos de salud mental ocupacional, apoyo por enfermedad y licencia familiar, además de garantizar una adecuada dotación de personal. Los estilos de superación personal y el crecimiento psicológico desempeñan un papel importante en el mantenimiento de la salud mental de las enfermeras.</p> <p><b>Fuerte a favor</b></p>                                                                                                                                                              |       |     |    |    |
| <p><b>5. ¿Cuáles estrategias de enfermería se pueden aplicar en el abordaje de la ansiedad por parte de la familia en los adultos con sospecha clínica o diagnóstico por COVID-19?</b></p> <p>Se recomienda ofrecer mecanismos de apoyo para amortiguar el estrés relacionado con la pandemia por COVID-19. Esto incluye intervenciones para pacientes y familias ofreciendo recursos de salud mental y educación al egreso, previo a este reforzar visitas virtuales.</p> <p><b>Fuerte a favor</b></p> <p>Se recomienda anticipar las necesidades de salud mental de los pacientes, el personal y las familias para ofrecer una respuesta integral de salud pública. Se debe incluir atención psicológica en la hospitalización para pacientes, familiares y personal afectado por COVID-19.</p> <p><b>Fuerte a favor</b></p> <p>Se recomienda proporcionar atención de salud mental en las comunidades, mientras que se requiere distanciamiento social y los recursos del sistema de salud son limitados.</p> <p><b>Fuerte a favor</b></p> | 9 (8) | 98% | 2% | 0% |

|                                                                                                                                                                                                                                                                                                                                                                                                                                                                                                                                                                                                                                                                                                                                                                                                                                                                                                                                                                                                                                                                                                                    |       |      |    |    |
|--------------------------------------------------------------------------------------------------------------------------------------------------------------------------------------------------------------------------------------------------------------------------------------------------------------------------------------------------------------------------------------------------------------------------------------------------------------------------------------------------------------------------------------------------------------------------------------------------------------------------------------------------------------------------------------------------------------------------------------------------------------------------------------------------------------------------------------------------------------------------------------------------------------------------------------------------------------------------------------------------------------------------------------------------------------------------------------------------------------------|-------|------|----|----|
| <p>Se recomienda mantener una estrategia de comunicación asertiva con la familia, teniendo en cuenta la formación del personal sobre las estrategias para comunicar malas noticias. Ser solidarios con el duelo de las familias y acompañar el proceso de afrontamiento aún en la distancia, identificando factores de riesgo para patología mental o duelo complicado, utilizando los recursos institucionales de salud mental para mejorar las intervenciones.</p> <p><b>Fuerte a favor</b></p>                                                                                                                                                                                                                                                                                                                                                                                                                                                                                                                                                                                                                  |       |      |    |    |
| <p><b>6.¿Cuáles son las consideraciones administrativas y de organización para tener en cuenta en la gestión del personal de enfermería al interior de las áreas de atención de los pacientes con sospecha o diagnóstico de COVID-19?</b></p> <p>Se recomienda crear grupos centralizados y definidos para atención de pacientes con sospecha o diagnóstico de COVID-19 que se encarguen de elaboración, socialización e implementación de protocolos. Estos deben incluir los aspectos de infraestructura, áreas delimitadas, utilización de EPP, listas de chequeo, observadores, insumos y recursos que permitan atención integral.</p> <p><b>Fuerte a favor</b></p> <p>Se recomienda organizar el plan de atención del paciente con sospecha o diagnóstico de COVID-19 de enfermería con la asignación de actividades, número de personas según escalas que midan escalas carga laboral para definir el número adecuado de los miembros del equipo de trabajo, tiempo de atención, gestión de recursos, gestión de riesgo y un líder por turno que garantice el cumplimiento.</p> <p><b>Fuerte a favor</b></p> | 9 (8) | 96%  | 4% | 0% |
| <b>X. Equipo de apoyo terapéutico y COVID-19</b>                                                                                                                                                                                                                                                                                                                                                                                                                                                                                                                                                                                                                                                                                                                                                                                                                                                                                                                                                                                                                                                                   |       |      |    |    |
| <p><b>1.¿Cuáles son las medidas para lograr buen rendimiento de las muestras, pero también seguridad al momento de la toma en el paciente con sospecha o diagnóstico de COVID-19?</b></p> <p>Se recomienda que las muestras clínicas tomadas para el diagnóstico de COVID-19 deben</p>                                                                                                                                                                                                                                                                                                                                                                                                                                                                                                                                                                                                                                                                                                                                                                                                                             | 9 (8) | 100% | 0% | 0% |



|                                                                                                                                                                                                                                                                                                                                                                                                                                                                                                                                                                                                                                                                                                                                                                                                                                                                                                                                                                                                                                                                                                                                                                                                                                                                                                                                                                                                                                  |       |     |    |    |
|----------------------------------------------------------------------------------------------------------------------------------------------------------------------------------------------------------------------------------------------------------------------------------------------------------------------------------------------------------------------------------------------------------------------------------------------------------------------------------------------------------------------------------------------------------------------------------------------------------------------------------------------------------------------------------------------------------------------------------------------------------------------------------------------------------------------------------------------------------------------------------------------------------------------------------------------------------------------------------------------------------------------------------------------------------------------------------------------------------------------------------------------------------------------------------------------------------------------------------------------------------------------------------------------------------------------------------------------------------------------------------------------------------------------------------|-------|-----|----|----|
| <p>conservarse a temperatura entre -2 a 8°C, y luego de las 48 horas deben permanecer congeladas a una temperatura de -70°C.</p> <p><b>Fuerte a favor</b></p> <p>Se recomienda que se realice el envío al laboratorio de salud pública de referencia dentro de las 48 horas posteriores a la toma de la muestra del paciente.</p> <p><b>Fuerte a favor</b></p> <p>Se recomienda que el transporte de las muestras debe realizarse con geles o pilas congeladas.</p> <p><b>Fuerte a favor</b></p> <p>Se recomienda considerar que las muestras del tracto respiratorio bajo presentan la mejor certeza diagnóstica en pacientes con neumonía para adultos intubados y ventilados mecánicamente con sospecha de COVID-19.</p> <p><b>Fuerte a favor</b></p> <p>Se recomienda contar con elementos de protección personal de acuerdo con las precauciones establecidas para la atención del paciente con sospecha o diagnóstico de COVID-19 para evitar la transmisión al profesional de la salud. Se debe evitar perder el circuito cerrado en los pacientes ventilados mecánicamente y valorar el riesgo de las acciones en pacientes con PEEP alta.</p> <p><b>Fuerte a favor</b></p> <p>Se recomienda realizar la toma de muestra post mortem no invasiva por hisopado nasofaríngeo dentro de las primeras seis (6) horas posteriores al fallecimiento, para que esta sea útil para su análisis.</p> <p><b>Fuerte a favor</b></p> |       |     |    |    |
| <p><b>2.¿Cómo debe el uso óptimo y escalonamiento entre los dispositivos de aporte de oxígeno (cánula nasal, máscara nasal, Venturi, máscara de no reinhalación)?</b></p> <p>Se recomienda en los pacientes con diagnóstico COVID-19, monitorizar continuamente la oxigenación mediante saturación arterial de oxígeno con pulso oxímetro y la aparición temprana de signos clínicos de dificultad respiratoria (aleteo nasal, cianosis, tirajes intercostales).</p>                                                                                                                                                                                                                                                                                                                                                                                                                                                                                                                                                                                                                                                                                                                                                                                                                                                                                                                                                             | 9 (8) | 92% | 2% | 6% |

|                                                                                                                                                                                                                                                                                                                                                                                                                                                                                                                                                                                                                                                                                                                                                                                                                                                                                                                                                                                                                                                                                                                                                                                                                                                                                                                                                       |       |     |    |     |
|-------------------------------------------------------------------------------------------------------------------------------------------------------------------------------------------------------------------------------------------------------------------------------------------------------------------------------------------------------------------------------------------------------------------------------------------------------------------------------------------------------------------------------------------------------------------------------------------------------------------------------------------------------------------------------------------------------------------------------------------------------------------------------------------------------------------------------------------------------------------------------------------------------------------------------------------------------------------------------------------------------------------------------------------------------------------------------------------------------------------------------------------------------------------------------------------------------------------------------------------------------------------------------------------------------------------------------------------------------|-------|-----|----|-----|
| <p><b>Fuerte a favor</b></p> <p>Se recomienda no suministrar de forma rutinaria oxígeno si la Saturación de Oxígeno (SpO2) está por encima de 94%, y no se evidencian signos clínicos de dificultad respiratoria durante la monitorización continua del patrón respiratorio.</p> <p><b>Fuerte en contra</b></p> <p>Se recomienda como parámetro importante para evaluar la oxigenación y guiar el suministro de oxígeno mediante los diferentes dispositivos la transferencia de Oxígeno, medida por la PaO2/FiO2 o SaO2/FiO2.</p> <p><b>Fuerte a favor</b></p> <p>Se propone iniciar la oxigenoterapia por cánulas de bajo flujo y ajustar el flujo (máximo 5 L) hasta alcanzar la SpO2 objetivo <math>\geq 94\%</math>; si el paciente se encuentra en estado crítico iniciar con mascarilla con bolsa de reserva (10–15 L / min). Una vez el paciente esté estable, el objetivo de oxigenación es mantener niveles de SpO2 entre 88 y 92% en pacientes no embarazadas y entre 92 y 95% en pacientes embarazadas.</p> <p><b>Punto de buena práctica clínica</b></p> <p>Se recomienda no utilizar de forma rutinaria el uso de dispositivos que generan aerosoles durante la administración de oxígeno (Dispositivos Venturi o Nebulizador de alto flujo o Jet) en pacientes con sospecha o diagnóstico COVID-19.</p> <p><b>Fuerte en contra</b></p> |       |     |    |     |
| <p><b>3.¿Se deben implementar cambios para realizar la prueba de respiración espontánea en un paciente adulto con sospecha clínica o diagnóstico por COVID-19?</b></p> <p>Se recomienda aplicar las estrategias de retiro de la ventilación mecánica habituales para pacientes adultos críticos en general no COVID, hasta el momento no se ha construido una evidencia contundente para un destete específico en COVID-19.</p> <p><b>Fuerte a favor</b></p> <p>Se recomienda en el paciente críticamente enfermo por COVID-19 un descenso de la presión de soporte (PSV) según tolerancia clínica, de esta forma el paciente podrá ser sometido a la</p>                                                                                                                                                                                                                                                                                                                                                                                                                                                                                                                                                                                                                                                                                             | 9 (8) | 86% | 4% | 10% |

|                                                                                                                                                                                                                                                                                                                                                                                                                                                                                                                                                                                                                                                                                                                                                                                                                                                                                                                                                                                                                                                                                                                                                              |       |     |    |    |
|--------------------------------------------------------------------------------------------------------------------------------------------------------------------------------------------------------------------------------------------------------------------------------------------------------------------------------------------------------------------------------------------------------------------------------------------------------------------------------------------------------------------------------------------------------------------------------------------------------------------------------------------------------------------------------------------------------------------------------------------------------------------------------------------------------------------------------------------------------------------------------------------------------------------------------------------------------------------------------------------------------------------------------------------------------------------------------------------------------------------------------------------------------------|-------|-----|----|----|
| <p>realización de prueba de respiración espontánea con una presión de soporte de entre 5-8 cm H<sub>2</sub>O.</p> <p><b>Fuerte a favor</b></p> <p>Se recomienda que el destete automatizado puede ser considerado como una herramienta útil según disponibilidad de equipos para realizarlo.</p> <p><b>Fuerte a favor</b></p> <p>Se recomienda no utilizar las maniobras que incrementan la aerosolización como la prueba de respiración espontánea en pieza en T o el Cuff-Leak Test en el momento de realizar la medición de los predictores de éxito en el destete.</p> <p><b>Fuerte en contra</b></p>                                                                                                                                                                                                                                                                                                                                                                                                                                                                                                                                                    |       |     |    |    |
| <p><b>4.¿Cuáles son las estrategias de cuidado del paciente adulto con sospecha clínica o diagnóstico por COVID-19 al momento de realización el procedimiento de extubación?</b></p> <p>Se recomienda que la extubación de los pacientes críticamente enfermos por COVID-19 se debe realizar con los elementos de protección personal requeridos para el riesgo de aerosoles.</p> <p><b>Fuerte a favor</b></p> <p>Se recomienda no estimular la tos y el esputo inducido en los pacientes con sospecha o diagnóstico de COVID-19 posterior a la extubación inmediata.</p> <p><b>Fuerte en contra</b></p> <p>Se recomienda no utilizar de forma rutinaria la VMNI en la falla respiratoria Post extubación en pacientes críticos que no tengan una enfermedad concomitante que sea respondedora a la VMNI como el EPOC o Edema Pulmonar de Origen Cardiogénico en pacientes con sospecha o diagnóstico de COVID-19.</p> <p><b>Fuerte en contra</b></p> <p>Se recomienda mantener un umbral bajo para decidir intubación en caso de sospecha de fallo en la extubación en el paciente con sospecha o diagnóstico de COVID-19.</p> <p><b>Fuerte a favor</b></p> | 9 (8) | 96% | 0% | 4% |
| <p><b>5.¿Qué sistema de oxigenoterapia estaría indicado luego de realizar la extubación en el paciente adulto con sospecha clínica o diagnóstico por COVID-19?</b></p>                                                                                                                                                                                                                                                                                                                                                                                                                                                                                                                                                                                                                                                                                                                                                                                                                                                                                                                                                                                       | 9 (8) | 90% | 4% | 6% |

|                                                                                                                                                                                                                                                                                                                                                                                                                                                                                                                                                                                                                                                                                                                                                                                                                                                                                                                                                                                                                                                                                                                                                                                           |       |     |    |    |
|-------------------------------------------------------------------------------------------------------------------------------------------------------------------------------------------------------------------------------------------------------------------------------------------------------------------------------------------------------------------------------------------------------------------------------------------------------------------------------------------------------------------------------------------------------------------------------------------------------------------------------------------------------------------------------------------------------------------------------------------------------------------------------------------------------------------------------------------------------------------------------------------------------------------------------------------------------------------------------------------------------------------------------------------------------------------------------------------------------------------------------------------------------------------------------------------|-------|-----|----|----|
| <p>Se recomienda utilizar en los pacientes con extubación reciente que no expresen predictores de riesgo de fracaso, sistemas de oxigenoterapia convencionales de bajo flujo que generen menor riesgo de aerosolización.</p> <p><b>Fuerte a favor</b></p> <p>Se podría considerar Cánulas de alto flujo de oxígeno y/o la ventilación mecánica no invasiva (con una máscara facial adecuadamente ajustada y ramas inspiratorias y espiratorias separadas) como terapia de puente después de la extubación, pero se deben brindar las condiciones estructurales necesarias (habitaciones de presión negativa o habitaciones aisladas de puertas cerradas) y con EPP estrictos para el personal sanitario.</p> <p><b>Fuerte a favor</b></p>                                                                                                                                                                                                                                                                                                                                                                                                                                                 |       |     |    |    |
| <p><b>6.¿Cómo debe ser la disposición final de los elementos a desechar posterior a la extubación de un paciente adulto con sospecha clínica o diagnóstico por COVID-19?</b></p> <p>Se recomienda limpiar y desinfectar con frecuencia el área de retiro de EPP, incluso después de que se haya completado cada procedimiento de eliminación. Se debe limpiar esta zona, pasando de las áreas más limpias a las más sucias, antes de ingresar a la habitación del paciente y realizar el manejo y disposición final de residuos.</p> <p><b>Fuerte a favor</b></p> <p>Se recomienda realizar la limpieza de superficies con un desinfectante adecuado o con una solución de hipoclorito sódico que contenga 5000 ppm de cloro activo (por ejemplo, un producto con hipoclorito en una concentración de 40-50 gr/litro, se hará una dilución 1:10 en el momento de su utilización).</p> <p><b>Fuerte a favor</b></p> <p>Se recomienda que los recipientes que contengan los residuos deberán quedar en el lugar designado a tal efecto, que permanecerá cerrado hasta que, según el procedimiento de gestión de residuos de la institución sean retirados.</p> <p><b>Fuerte a favor</b></p> | 9 (8) | 94% | 2% | 4% |

|                                                                                                                                                                                                                                                                                                                                                                                                                                                                                                                                                                                                                                                                                                                                                                                                                                                                                                                                                                                                                                                                                    |       |     |    |    |
|------------------------------------------------------------------------------------------------------------------------------------------------------------------------------------------------------------------------------------------------------------------------------------------------------------------------------------------------------------------------------------------------------------------------------------------------------------------------------------------------------------------------------------------------------------------------------------------------------------------------------------------------------------------------------------------------------------------------------------------------------------------------------------------------------------------------------------------------------------------------------------------------------------------------------------------------------------------------------------------------------------------------------------------------------------------------------------|-------|-----|----|----|
| <p><b>7.¿Existe una herramienta superior para titular la PEEP en el paciente en ventilación mecánica con sospecha o diagnóstico de COVID-19?</b></p> <p>Se recomienda utilizar un ajuste de PEEP del paciente crítico por COVID-19, basado adicional a la tabla de PEEP, en las condiciones clínicas del paciente, en los índices de oxigenación, en la mecánica respiratoria del paciente y en los métodos de monitoreo disponibles.</p> <p><b>Fuerte a favor</b></p> <p>Se recomienda titular la PEEP más alta que mantenga o mejore la relación SAFI y permita una presión meseta <math>\leq 30</math> cmH<sub>2</sub>O.</p> <p><b>Fuerte a favor</b></p> <p>Se recomienda utilizar otras estrategias de titulación de PEEP probadas y con las cuales el equipo de trabajo esté familiarizado, dependiendo de la disponibilidad del recurso: ensayo de PEEP decremental precedido por una maniobra de reclutamiento; titulación mediante la estimación de la presión transpulmonar con catéter esofágico o tomografía de impedancia eléctrica.</p> <p><b>Fuerte a favor</b></p> | 9 (7) | 88% | 8% | 4% |
| <p><b>8.¿Se debe implementar protocolos de rehabilitación física y bajo cuales criterios en paciente con sospecha o diagnóstico de COVID-19 durante la ventilación mecánica y posterior a la extubación?</b></p> <p>Se recomienda aplicar protocolos de rehabilitación física como estrategia beneficiosa en el tratamiento respiratorio y físico de pacientes críticamente enfermos por COVID-19.</p> <p><b>Fuerte a favor</b></p> <p>Se recomienda realizar la movilización precoz del paciente críticamente enfermo por COVID-19 durante el curso de la enfermedad siempre que sea posible hacerlo de forma segura, asegurando la protección personal del personal sanitario.</p> <p><b>Fuerte a favor</b></p>                                                                                                                                                                                                                                                                                                                                                                  | 9 (8) | 98% | 2% | 0% |
| <p><b>Recomendaciones de Buena práctica clínica</b></p> <p><b>No votadas por Delphi</b></p>                                                                                                                                                                                                                                                                                                                                                                                                                                                                                                                                                                                                                                                                                                                                                                                                                                                                                                                                                                                        |       |     |    |    |
| <p><b>Dexametasona y COVID-19</b></p> <p>Basados en un estudio preliminar aún sin publicar, se podría sugerir el uso de dexametasona a dosis de 6 mg (oral o venosos) por 10 días o hasta el alta</p>                                                                                                                                                                                                                                                                                                                                                                                                                                                                                                                                                                                                                                                                                                                                                                                                                                                                              |       |     |    |    |

|                                                                                                                                                                                                                                                                                                                                                                                                                                                                                                                                                                                                                                                                                            |  |  |  |  |
|--------------------------------------------------------------------------------------------------------------------------------------------------------------------------------------------------------------------------------------------------------------------------------------------------------------------------------------------------------------------------------------------------------------------------------------------------------------------------------------------------------------------------------------------------------------------------------------------------------------------------------------------------------------------------------------------|--|--|--|--|
| <p>si ocurre primero en pacientes hospitalizados con sospecha o diagnóstico de COVID-19 que requieren suplencia de oxígeno, incluyendo aquellos con ventilación mecánica, que sean menores de 70 años y con más de 7 días de síntomas.</p>                                                                                                                                                                                                                                                                                                                                                                                                                                                 |  |  |  |  |
| <p><b>Baricitinib y COVID-19</b></p> <p>No se emite recomendación a favor ni en contra para él con el inhibidor de la janus quinasa (Baricitinib) en los pacientes con sospecha clínica o diagnóstico de COVID-19 severo.</p>                                                                                                                                                                                                                                                                                                                                                                                                                                                              |  |  |  |  |
| <p><b>Calidad de vida</b></p> <p>Se recomienda utilizar los marcadores disponibles de severidad y del riesgo de mortalidad por COVID-19 en los pacientes internados en la UCI.</p> <p>No se dispone de herramientas validadas para medir la calidad de vida de los pacientes con COVID-19 durante su estancia en UCI o posterior al egreso. Es razonable medir las secuelas inmediatas en los pacientes víctimas del devastador ataque sistémico del COVID-19 durante su estancia en la UCI.</p> <p>Se sugiere realizar estudios de creación, validación y utilización de instrumentos de valoración de la calidad de vida en pacientes con COVID-19 posteriores al alta hospitalaria.</p> |  |  |  |  |
| <p><b>Nutrición</b></p> <p><b>Nutrición enteral posición prono:</b></p> <p>No existe evidencia que indique que la nutrición enteral durante la posición prono aumente el riesgo de complicaciones.</p> <p>Sugerimos no suspender nutrición enteral al durante la pronación, se debe iniciar con dosis trófica de 20 ml/h.</p> <p>Se recomienda una estrecha monitorización de la tolerancia a la nutrición enteral para pacientes en posición prono.</p> <p>Se recomienda para aumentar la tolerancia de la NE a los pacientes en posición prona, una elevación del tórax entre 10-25° (posición de Trendelenburg inversa)</p>                                                             |  |  |  |  |

|                                                                                                                                                                                                                                                                                                                                                                                                                                                                                                                                                                                                                                                                                                                                                                                                                                                    |  |  |  |  |
|----------------------------------------------------------------------------------------------------------------------------------------------------------------------------------------------------------------------------------------------------------------------------------------------------------------------------------------------------------------------------------------------------------------------------------------------------------------------------------------------------------------------------------------------------------------------------------------------------------------------------------------------------------------------------------------------------------------------------------------------------------------------------------------------------------------------------------------------------|--|--|--|--|
| <p>No realizar endoscopias digestivas para ubicación de sondas avanzadas</p> <p><b>Nutrición Parenteral:</b></p> <p>La Nutrición Parenteral (NP) debe utilizarse donde la alimentación enteral no está disponible o no logra completar el 60% de los requerimientos.</p> <p>Si existen limitaciones para la ruta enteral, se podría recomendar nutrición parenteral periférica (NPP) en la población que no alcanza el objetivo proteico energético por nutrición oral o enteral.</p> <p>La NP temprana debe iniciarse lo antes posible en el paciente de alto riesgo para el cual la NE gástrica o yeyunal temprana no es factible.</p> <p>Los pacientes de alto riesgo incluyen aquellos con sepsis o shock que requieren múltiples vasopresores o en aumento, o cuando se requiere soporte respiratorio de alta presión (NIV, CPAP o PEEP).</p> |  |  |  |  |
|----------------------------------------------------------------------------------------------------------------------------------------------------------------------------------------------------------------------------------------------------------------------------------------------------------------------------------------------------------------------------------------------------------------------------------------------------------------------------------------------------------------------------------------------------------------------------------------------------------------------------------------------------------------------------------------------------------------------------------------------------------------------------------------------------------------------------------------------------|--|--|--|--|
